# Supplementary material for: A systematic review and embryological perspective of pluripotent stem cell-derived autonomic postganglionic neuron differentiation for human disease modeling
Source: eLife. 2025 Mar 12;14:e103728. doi: 10.7554/eLife.103728 (PMC11961123; doi:10.7554/eLife.103728)
Supplement: Source data 1. — All title-abstract exclusion reasons per record. Please see Supplementary file 1 for exclusion reasons during full-text screening. n/a, not available. Dataset relating to Figure 7A and B. Definitions of sympathetic neurons per article. Only one of quantification, immunofluorescence or RT-qPCR data was collected per article. Quantification data was preferentially collected over immunofluorescence or RT-qPCR. Immunofluorescence data was collected preferentially over RT-qPCR. n/a, not available; RT-qPCR, quantitative reverse transcriptase polymerase chain reaction. Dataset relating to Figure 7C: sympathetic neuron efficiency quantification per article. Only one efficiency marker was collected per article. %TH+ was collected preferentially over the other markers. %TH+ PRPH+ was collected preferentially over %GATA3+ and %DBH+. DBH, dopamine beta-hydroxylase; GATA3, GATA binding protein 3; n/a, not available; NR, not reported; PRPH, peripherin; TH, tyrosine hydroxylase. [file elife-103728-data1.xlsx]

## Sheet: Figure 1
Record title	Doi (if available)	Exclusion reason
[Developing of a new feeder-free system and characterization of human embryonic stem cell sublines derived in this system under autogenic and allogenic culturing]	n/a	wrong cell type		Figure 1 - Title-abstract screening exclusion reasons
<i>Aquarius</i>, a novel gene isolated by gene trapping with an RNA-dependent RNA polymerase motif	10.1002/(sici)1097-0177(199806)212:2<304::Aid-aja15>3.3.Co;2-z	non-human		All title-abstract exclusion reasons per record. n/a = not available.
Multipotent and restricted precursors in the central nervous system	10.1002/(sici)1097-0185(19990815)257:4<137::Aid-ar7>3.0.Co;2-q	wrong publication type		Please see Supplementary File 1 for exclusion reasons during full-text screening.
Differential effects of Bcl-2 overexpression on hippocampal CA1 neurons and dentate granule cells following hypoxic ischemia in adult mice	10.1002/(sici)1097-4547(19990701)57:1<1::Aid-jnr1>3.0.Co;2-y	non-human
Synaptic signalling in a network of dopamine neurons: what prevents proper intercellular crosstalk?	10.1002/1873-3468.13910	wrong cell type
Scalable production of transplantable dopaminergic neurons from hESCs and iPSCs in xeno-free defined conditions	10.1002/9780470151808.sc02d12s22	wrong cell type
Asymmetric Strain-Introduced Interface Effect on the Electronic and Optical Properties of the CsPbI3/SnS van der Waals Heterostructure	10.1002/admi.201901330	wrong publication type
Uncovering the role of FOXA2 in the Development of Human Serotonin Neurons	10.1002/advs.202303884	wrong cell type
Immobilized NRG1 Accelerates Neural Crest like Cell Differentiation Toward Functional Schwann Cells Through Sustained Erk1/2 Activation and YAP/TAZ Nuclear Translocation	10.1002/advs.202402607	wrong cell type
BACKTRANSPLANTATION OF CHICK CARDIAC NEURAL CREST CELLS CULTURED IN LIF RESCUES HEART DEVELOPMENT	10.1002/aja.1001980407	non-human
ADHD-associated PARK2 copy number variants: A pilot study on gene expression and effects of supplementary deprivation in patient-derived cell lines	10.1002/ajmg.b.32918	wrong cell type
Synthesis and molecular docking simulation of new benzimidazole-thiazole hybrids as cholinesterase inhibitors	10.1002/ardp.202300201	wrong cell type
The neural crest: basic biology and clinical relationships in the craniofacial and enteric nervous systems	10.1002/bdrc.20013	wrong publication type
Generating human serotonergic neurons in vitro: Methodological advances	10.1002/bies.201600127	wrong publication type
Embryonic and induced pluripotent stem cell differentiation as a tool in neurobiology	10.1002/biot.201200040	wrong publication type
Using iPSC-derived human DA neurons from opioid-dependent subjects to study dopamine dynamics	10.1002/brb3.491	wrong cell type
Directed differentiation of human embryonic stem cell-line HUES9 to dopaminergic neurons in a serum-free defined culture niche	10.1002/cbin.10012	wrong cell type
Class III beta-tubulin in human development and cancer	10.1002/cm.10116	wrong publication type
Induced neuronal reprogramming	10.1002/cne.23620	wrong publication type
Overview of Methods to Differentiate Sympathetic Neurons from Human Pluripotent Stem Cells	10.1002/cpsc.92	wrong publication type
Generating Enteric Nervous System Progenitors from Human Pluripotent Stem Cells	10.1002/cpz1.137	wrong cell type
Autologous Induced Pluripotent Stem Cell-Based Cell Therapies: Promise, Progress, and Challenges	10.1002/cpz1.88	wrong publication type
Hypoxia inducible factor-2alpha importance for migration, proliferation, and self-renewal of trunk neural crest cells	10.1002/dvdy.253	no pluripotent stem cells/immortalization
Specific induction of cranial placode cells from Xenopus ectoderm by modulating the levels of BMP, Wnt, and FGF signaling	10.1002/dvg.22881	non-human
Pathophysiology of Takotsubo syndrome - a joint scientific statement from the Heart Failure Association Takotsubo Syndrome Study Group and Myocardial Function Working Group of the European Society of Cardiology - Part 2: vascular pathophysiology, gender and sex hormones, genetics, chronic cardiov...	10.1002/ejhf.2368	wrong publication type
Quantitative analysis of serotonin secreted by human embryonic stem cells-derived serotonergic neurons via pH-mediated online stacking-CE-ESI-MRM	10.1002/elps.201500496	wrong cell type
Autophagic control of cell 'stemness'	10.1002/emmm.201201999	wrong publication type
SpL201: A conditionally immortalized Schwann cell precursor line that generates myelin	10.1002/glia.1093	non-human
Double-stranded RNA induces iNOS gene expression in Schwann cells, sensory neuronal death, and peripheral nerve demyelination	10.1002/glia.20493	wrong cell type
Mesenchymal stem cells facilitate axon sorting, myelination, and functional recovery in paralyzed mice deficient in Schwann cell-derived laminin	10.1002/glia.21099	no pluripotent stem cells/immortalization
Nuc-ErbB3 Regulates H3K27me3 Levels and HMT Activity to Establish Epigenetic Repression during Peripheral Myelination	10.1002/glia.22977	non-human
Pancreatic Schwann cell reprogramming supports cancer-associated neuronal remodeling	10.1002/glia.24586	wrong cell type
Update on the role of emerging stem cell technology in head and neck medicine	10.1002/hed.26674	wrong publication type
LEUKEMIA INHIBITORY FACTOR - A BIOLOGICAL PERSPECTIVE	10.1002/jcb.240460105	wrong publication type
Dental pulp stem cells and their potential roles in central nervous system regeneration and repair	10.1002/jnr.23250	wrong publication type
Adipocytes derived from PA6 cells reliably promote the differentiation of dopaminergic neurons from human embryonic stem cells	10.1002/jnr.23355	wrong cell type
Potential of neural stem cell-based therapies for Alzheimer's disease	10.1002/jnr.23555	wrong publication type
Studying the pathophysiologic connection between cardiovascular and nervous systems using stem cells	10.1002/jnr.23924	wrong publication type
CHARACTERIZATION OF A SCHWANN-CELL NEURITE-PROMOTING ACTIVITY THAT DIRECTS MOTONEURON AXON OUTGROWTH	10.1002/jnr.490370105	non-human
IN-VITRO AND IN-VIVO CHARACTERIZATION OF GLIAL-CELLS IMMORTALIZED WITH A TEMPERATURE-SENSITIVE SV40-T ANTIGEN-CONTAINING RETROVIRUS	10.1002/jnr.490370204	non-human
Induced pluripotent stem cells can be a useful disease model for understanding the pathomechanisms of PARK2	10.1002/mds.25374	wrong publication type
Stem cell reprogramming: Basic implications and future perspective for movement disorders	10.1002/mds.26113	wrong publication type
Evidence brings hope for high-yield dopaminergic human-induced pluripotent stem cell transplant	10.1002/mds.26908	wrong publication type
New therapeutic target for CNS injury? The role of retinoic acid signaling after nerve lesions	10.1002/neu.20238	wrong publication type
Differentiation of embryonic stem cells into functional neurons in vitro	10.1002/nrc.20027	non-human
Highly efficient neural conversion of human pluripotent stem cells in adherent and animal-free conditions	10.1002/sctm.16-0371	wrong cell type
A Comprehensive Analysis of Protocols for Deriving Dopaminergic Neurons from Human Pluripotent Stem Cells	10.1002/sctm.18-0088	wrong publication type
Chemotherapy-Induced Neuropathy and Drug Discovery Platform Using Human Sensory Neurons Converted Directly from Adult Peripheral Blood	10.1002/sctm.19-0054	wrong cell type
Enhanced differentiation of human induced pluripotent stem cells toward the midbrain dopaminergic neuron lineage through GLYPICAN-4 downregulation	10.1002/sctm.20-0177	wrong cell type
Specification of midbrain dopamine neurons from primate pluripotent stem cells	10.1002/stem.1152	wrong cell type
Glycogen synthase kinase 3beta and activin/nodal inhibition in human embryonic stem cells induces a pre-neuroepithelial state that is required for specification to a floor plate cell lineage	10.1002/stem.1204	wrong cell type
Concise review: From Greenhouse to Garden: The changing soil of the hematopoietic stem cell microenvironment during development	10.1002/stem.1680	wrong publication type
Isolation of Neural Crest Derived Chromaffin Progenitors from Adult Adrenal Medulla	10.1002/stem.180	non-human
Adenoviral gene delivery can reprogram human fibroblasts to induced pluripotent stem cells	10.1002/stem.201	wrong cell type
On the road again: Establishment and maintenance of stemness in the neural crest from embryo to adulthood	10.1002/stem.3283	wrong publication type
The controlled generation of functional basal forebrain cholinergic neurons from human embryonic stem cells	10.1002/stem.626	wrong cell type
A NEW PERSPECTIVE ON THE INHIBITORY ROLE OF NITRIC-OXIDE IN SYMPATHETIC NEUROTRANSMISSION	10.1006/bbrc.1995.2676	non-human
DIFFERENTIATION OF HIPPOCAMPAL PROGENITOR CELLS IN-VITRO - TEMPORAL EXPRESSION OF INTERCELLULAR COUPLING AND VOLTAGE-GATED AND LIGAND-GATED RESPONSES	10.1006/dbio.1995.1029	non-human
Defective vascularization of HIF-1α-null embryos is not associated with VEGF deficiency but with mesenchymal cell death	10.1006/dbio.1999.9253	non-human
Human iPS Cells for Clinical Applications and Cellular Products	10.1007/164_2023_643	wrong publication type
Human embryonic stem cell derivation and directed differentiation	10.1007/3-540-37644-5_3	wrong publication type
Human hair follicle associated-pluripotent (hHAP) stem cells differentiate to cardiac muscle cells	10.1007/7651_2018_170	wrong publication type
A review of the cholinergic system and therapeutic approaches to treat brain disorders	10.1007/7854_2020_141	wrong publication type
New Pharmacological Interventions in Bipolar Disorder	10.1007/7854_2020_181	wrong publication type
Involvement of DA D3 Receptors in Structural Neuroplasticity of Selected Limbic Brain Circuits: Possible Role in Treatment-Resistant Depression	10.1007/7854_2022_348	wrong cell type
Murine Teratocarcinoma-Derived Neuronal Cultures	10.1007/978-1-0716-1437-2_4	non-human
Generation of Embryonic Origin-Specific Vascular Smooth Muscle Cells from Human Induced Pluripotent Stem Cells	10.1007/978-1-0716-1979-7_15	wrong cell type
Transcription Factor-Directed Dopaminergic Neuron Differentiation from Human Pluripotent Stem Cells	10.1007/978-1-0716-3287-1_4	wrong cell type
Differentiating SH-SY5Y Cells into Polarized Human Neurons for Studying Endogenous and Exogenous Tau Trafficking: Four Protocols to Obtain Neurons with Noradrenergic, Dopaminergic, and Cholinergic Properties	10.1007/978-1-0716-3629-9_30	no pluripotent stem cells/immortalization
Assay for assessing mitochondrial function in iPSC-derived neural stem cells and dopaminergic neurons	10.1007/978-1-4939-9007-8_12	wrong cell type
Generating neural stem cells from iPSCs with dopaminergic neurons reporter gene	10.1007/978-1-4939-9007-8_9	wrong cell type
The Neural Crest: A Remarkable Model System for Studying Development and Disease	10.1007/978-1-4939-9412-0_1	wrong publication type
Episomal transgene expression in pluripotent stem cells	10.1007/978-1-61779-201-4_27	wrong cell type
Neural induction with a dopaminergic phenotype from human pluripotent stem cells through a feeder-free floating aggregation culture	10.1007/978-1-62703-444-9-2	wrong cell type
The Origin of a New Progenitor Stem Cell Group in Human Development	10.1007/978-3-030-02050-7_1	wrong publication type
Neural Crest	10.1007/978-3-031-44087-8_6	wrong publication type
Stem cell therapies for neurodegenerative diseases	10.1007/978-3-319-74470-4_5	wrong publication type
Induced pluripotency for the study of disease mechanisms and cell therapy	10.1007/978-94-017-9214-1_10	wrong publication type
Induction of mature neuronal properties in immortalized neuronal precursor cells following grafting into the neonatal CNS	10.1007/bf02284789	wrong cell type
Using human pluripotent stem cells to untangle neurodegenerative disease mechanisms	10.1007/s00018-010-0557-6	wrong publication type
Specification of neuronal and glial subtypes from human pluripotent stem cells	10.1007/s00018-011-0770-y	wrong publication type
Current perspectives of the signaling pathways directing neural crest induction	10.1007/s00018-012-0991-8	wrong publication type
Canonical and noncanonical Wnt signaling in neural stem/progenitor cells	10.1007/s00018-015-2028-6	wrong publication type
Technical approaches to induce selective cell death of pluripotent stem cells	10.1007/s00018-017-2486-0	wrong publication type
Regulation of the expression of the estrogen related receptors (ERRs)	10.1007/s00018-020-03549-0	wrong publication type
SHANK3 deficiency leads to myelin defects in the central and peripheral nervous system	10.1007/s00018-022-04400-4	non-human
LRP10 and alpha-synuclein transmission in Lewy body diseases	10.1007/s00018-024-05135-0	wrong cell type
High-affinity nicotinic acetylcholine receptor expression and trafficking abnormalities in psychiatric illness	10.1007/s00213-013-3126-5	wrong publication type
Developmental Signaling in Myocardial Progenitor Cells: A Comprehensive View of Bmp- and Wnt/β-Catenin Signaling	10.1007/s00246-008-9352-7	wrong publication type
German Cardiac Society Working Group on Cellular Electrophysiology state-of-the-art paper: impact of molecular mechanisms on clinical arrhythmia management	10.1007/s00392-018-1377-1	wrong publication type
Endocytic vesicle rupture is a conserved mechanism of cellular invasion by amyloid proteins	10.1007/s00401-017-1722-x	wrong cell type
Stem cells in the treatment of central nervous system disease	10.1007/s00415-018-8818-7	wrong publication type
Embryonic stem cell-derived neurogenesis: Retinoic acid induction and lineage selection of neuronal cells	10.1007/s004410100416	wrong publication type
Serotonin in psychiatry: in vitro disease modeling using patient-derived neurons	10.1007/s00441-017-2670-4	wrong publication type
From proliferation to target innervation: signaling molecules that direct sympathetic nervous system development	10.1007/s00441-017-2693-x	wrong publication type
Single-cell transcriptomics reveals multiple neuronal cell types in human midbrain-specific organoids	10.1007/s00441-020-03249-y	wrong cell type
Cutting-edge regenerative therapy for Hirschsprung disease and its allied disorders	10.1007/s00595-023-02741-6	wrong publication type
Induced pluripotent stem cells as tools for disease modelling and drug discovery in Alzheimer's disease	10.1007/s00702-012-0839-2	wrong publication type
Serotonin-specific neurons differentiated from human iPSCs form distinct subtypes with synaptic protein assembly	10.1007/s00702-021-02303-5	wrong cell type
Up-regulation of SNCA gene expression: implications to synucleinopathies	10.1007/s10048-016-0478-0	wrong publication type
Osteopontin and clusterin levels in type 2 diabetes mellitus: differential association with peripheral autonomic nerve function	10.1007/s10072-017-3019-1	wrong publication type
Induced pluripotent stem cells for disease modeling, cell therapy and drug discovery in genetic autonomic disorders: a review	10.1007/s10286-018-00587-4	wrong publication type
Induced pluripotent stem cells (iPSCs) as model to study inherited defects of neurotransmission in inborn errors of metabolism	10.1007/s10545-018-0225-9	wrong publication type
The translational potential of human induced pluripotent stem cells for clinical neurology: The translational potential of hiPSCs in neurology	10.1007/s10565-016-9372-7	wrong publication type
Revisiting a Telencephalic Extent of the Ascending Reticular Activating System	10.1007/s10571-023-01339-3	wrong publication type
ReNCell VM conditioned medium enhances the induction of dental pulp stem cells into dopaminergic like cells	10.1007/s10616-014-9787-z	no pluripotent stem cells/immortalization
Hydrocortisone enhances the function of the blood-nerve barrier through the up-regulation of claudin-5	10.1007/s11064-011-0413-6	wrong cell type
Fatty Acid Binding Proteins Expressed at the Human Blood-Brain Barrier Bind Drugs in an Isoform-Specific Manner	10.1007/s11095-015-1764-5	wrong cell type
Progerin expression induces a significant downregulation of transcription from human repetitive sequences in iPSC-derived dopaminergic neurons	10.1007/s11357-018-00050-2	wrong cell type
Therapeutic effects of human amniotic epithelial cell transplantation on double-transgenic mice co-expressing APPswe and PS1DELTAE9-deleted genes	10.1007/s11427-012-4283-1	no pluripotent stem cells/immortalization
Human iPSC-derived mesenchymal stem cells relieve high blood pressure in spontaneously hypertensive rats via splenic nerve activated choline acetyltransferase-positive cells	10.1007/s11427-023-2675-2	wrong cell type
Stem cell therapy for central nervous system demyelinating disease	10.1007/s11910-005-0050-z	wrong publication type
Review of the Current Trends in Clinical Trials Involving Induced Pluripotent Stem Cells	10.1007/s12015-021-10262-3	wrong publication type
"Cutting the Mustard" with Induced Pluripotent Stem Cells: An Overview and Applications in Healthcare Paradigm	10.1007/s12015-022-10390-4	wrong publication type
Pluripotent Stem Cell-derived Dopaminergic Neurons for Studying Developmental Neurotoxicity	10.1007/s12015-023-10555-9	wrong cell type
Unleashing the Power of Induced Pluripotent stem Cells in in vitro Modelling of Lesch-Nyhan Disease	10.1007/s12015-024-10821-4	wrong publication type
S6K Promotes Dopaminergic Neuronal Differentiation Through PI3K/Akt/mTOR-Dependent Signaling Pathways in Human Neural Stem Cells	10.1007/s12035-015-9325-9	wrong cell type
Induced Pluripotent Stem Cells in Huntington's Disease: Disease Modeling and the Potential for Cell-Based Therapy	10.1007/s12035-015-9601-8	wrong publication type
Direct conversion of somatic cells into induced neurons	10.1007/s12035-016-0350-0	wrong publication type
Role of Dopamine D2/D3 Receptors in Development, Plasticity, and Neuroprotection in Human iPSC-Derived Midbrain Dopaminergic Neurons	10.1007/s12035-016-0376-3	wrong cell type
Bisphenol A Represses Dopaminergic Neuron Differentiation from Human Embryonic Stem Cells through Downregulating the Expression of Insulin-like Growth Factor 1	10.1007/s12035-016-9898-y	wrong cell type
Microfluidic Brain-on-a-Chip: Perspectives for Mimicking Neural System Disorders	10.1007/s12035-019-01653-2	wrong publication type
Structural Plasticity of Dopaminergic Neurons Requires the Activation of the D3R-nAChR Heteromer and the PI3K-ERK1/2/Akt-Induced Expression of c-Fos and p70S6K Signaling Pathway	10.1007/s12035-022-02748-z	wrong cell type
Mendelian Randomization Study Using Dopaminergic Neuron-Specific eQTL Identifies Novel Risk Genes for Schizophrenia	10.1007/s12035-022-03160-3	wrong cell type
Induced pluripotent stem cells and neurodegenerative diseases	10.1007/s12264-011-1147-9	wrong publication type
HiPS-Cardiac Trilineage Cell Generation and Transplantation: a Novel Therapy for Myocardial Infarction	10.1007/s12265-019-09891-4	wrong cell type
The Effects of Quinine on Neurophysiological Properties of Dopaminergic Neurons	10.1007/s12640-017-9855-1	wrong cell type
Cellular models for disease exploring and drug screening	10.1007/s13238-010-0027-9	wrong publication type
Converted neural cells: Induced to a cure?	10.1007/s13238-012-2029-2	wrong publication type
Genome engineering of stem cell organoids for disease modeling	10.1007/s13238-016-0368-0	wrong publication type
Bioinformatic and Genomic Analyses of Cellular Reprogramming and Direct Lineage Conversion	10.1007/s40495-016-0054-1	wrong publication type
APOPTOTIC CELL-DEATH OF A TEMPERATURE-SENSITIVE CENTRAL NEURONAL CELL-LINE	10.1016/0006-8993(95)00329-o	non-human
V-myc immortalization of early rat neural crest cells yields a clonal cell line which generates both glial and adrenergic progenitor cells	10.1016/0012-1606%2891%2990220-W	non-human
Retinoic acid induces cholinergic differentiation of NTera 2 human embryonal carcinoma cells	10.1016/0736-5748(95)00025-c	no pluripotent stem cells/immortalization
From Ontogenesis to Regeneration: Learning how to Instruct Adult Cardiac Progenitor Cells	10.1016/b978-0-12-398459-3.00005-8	wrong publication type
Making of a retinal cell: Insights into retinal cell-fate determination	10.1016/B978-0-12-800097-7.00007-5	wrong publication type
Pluripotent stem cell derived intestinal organoids with an enteric nervous system	10.1016/bs.mcb.2020.04.012	wrong cell type
Reprogramming of somatic cells: iPS and iN cells	10.1016/bs.pbr.2016.12.009	no pluripotent stem cells/immortalization
Embryonic hematopoietic stem cells and interstitial Cajal cells in the hindgut of late stage human embryos: evidence and hypotheses	10.1016/j.aanat.2015.01.001	no pluripotent stem cells/immortalization
The role of nuclear receptors in controlling the fine balance between proliferation and differentiation of neural stem cells	10.1016/j.abb.2012.09.009	wrong publication type
Hydrogen Bonding Stiffens Peptide Amphiphile Supramolecular Filaments by Aza-Glycine Residues	10.1016/j.actbio.2021.08.044	wrong cell type
A comparison of in vitro treatments for directing stem cells toward a sensory neural fate	10.1016/j.amjoto.2010.12.009	wrong cell type
Microenvironment-evoked cell lineage conversion: Shifting the focus from internal reprogramming to external forcing	10.1016/j.arr.2012.04.002	wrong publication type
Current status of stem cell research: An editorial	10.1016/j.bbadis.2019.165635	wrong publication type
Human-induced pluripotent stems cells as a model to dissect the selective neurotoxicity of methylmercury	10.1016/j.bbagen.2019.02.002	wrong publication type
A novel neuronal organoid model mimicking glioblastoma (GBM) features from induced pluripotent stem cells (iPSC)	10.1016/j.bbagen.2020.129540	non-homogenous
The shedding protease ADAM17: Physiology and pathophysiology	10.1016/j.bbamcr.2017.07.001	wrong publication type
Netrin-1 induces the migration of Schwann cells via p38 MAPK and PI3K-Akt signaling pathway mediated by the UNC5B receptor	10.1016/j.bbrc.2015.06.140	non-human
Functional innervation of human induced pluripotent stem cell-derived cardiomyocytes by co-culture with sympathetic neurons developed using a microtunnel technique	10.1016/j.bbrc.2017.10.065	non-human
Adverse effects of nicotine on cardiogenic differentiation from human embryonic stem cells detected by single-cell RNA sequencing	10.1016/j.bbrc.2020.03.149	wrong cell type
Golgi damage caused by dysfunction of PiT-2 in primary familial brain calcification	10.1016/j.bbrc.2022.12.050	wrong cell type
Robust differentiation of human pluripotent stem cells into Schwann cells	10.1016/j.bbrc.2024.150353	wrong cell type
Neuroprotective efficacy of thymoquinone against amyloid beta-induced neurotoxicity in human induced pluripotent stem cell-derived cholinergic neurons	10.1016/j.bbrep.2018.12.005	wrong cell type
The novel hybrid agonist HyNDA-1 targets the D3R-nAChR heteromeric complex in dopaminergic neurons	10.1016/j.bcp.2019.02.019	wrong cell type
iPSCs-derived mesenchymal stromal cells mitigate anxiety and neuroinflammation in aging female mice	10.1016/j.biocel.2022.106347	wrong cell type
Engraftable neural crest stem cells derived from cynomolgus monkey embryonic stem cells	10.1016/j.biomaterials.2014.10.056	non-human
Derivation of Schwann cell precursors from neural crest cells resident in bone marrow for cell therapy to improve peripheral nerve regeneration	10.1016/j.biomaterials.2016.02.029	non-human
Instant neurons: Directed somatic cell reprogramming models of central nervous system disorders	10.1016/j.biopsych.2013.10.027	wrong publication type
Out of the Cave, Into the Light? Modeling Mental Illness With Organoids	10.1016/j.biopsych.2018.02.001	wrong publication type
Atypical Neurogenesis in Induced Pluripotent Stem Cells From Autistic Individuals	10.1016/j.biopsych.2020.06.014	wrong cell type
Integrating the Neurodevelopmental and Dopamine Hypotheses of Schizophrenia and the Role of Cortical Excitation-Inhibition Balance	10.1016/j.biopsych.2022.06.017	wrong publication type
Seeing the Forest for the Trees: Dissecting Causal Mechanisms for Specific Conditions Associated With Shared Genetic Risk	10.1016/j.biopsych.2023.05.007	wrong publication type
Sensitive detection of electrophysiology and dopamine vesicular exocytosis of hESC-derived dopaminergic neurons using multifunctional microelectrode array	10.1016/j.bios.2022.114263	wrong cell type
Fentanyl inhibits GABAergic neurotransmission to cardiac vagal neurons in the nucleus ambiguus	10.1016/j.brainres.2004.02.010	no pluripotent stem cells/immortalization
PA6-induced human embryonic stem cell-derived neurospheres: a new source of human peripheral sensory neurons and neural crest cells	10.1016/j.brainres.2008.07.029	wrong cell type
Fetal mouse mesencephalic NPCs generate dopaminergic neurons from post-mitotic precursors and maintain long-term neural but not dopaminergic potential in vitro	10.1016/j.brainres.2012.07.034	wrong cell type
Engineering a second brain in a dish	10.1016/j.brainres.2018.04.015	wrong publication type
Cells of the sympathoadrenal lineage: Biological properties as donor tissue for cell-replacement therapies for Parkinson's disease	10.1016/j.brainresrev.2005.01.004	wrong publication type
Cross-talk of oploid peptide receptor and beta-adrenergic receptor signalling in the heart	10.1016/j.cardiores.2004.04.022	wrong publication type
Role of bone morphogenetic proteins in cardiac differentiation	10.1016/j.cardiores.2006.11.022	wrong publication type
Mitochondrial dysfunction in neurodegenerative diseases: A focus on iPSC-derived neuronal models	10.1016/j.ceca.2021.102362	wrong publication type
Differentiation of Embryonic Stem Cells to Clinically Relevant Populations: Lessons from Embryonic Development	10.1016/j.cell.2008.02.008	wrong publication type
High-Throughput Screening for Bioactive Molecules Using Primary Cell Culture of Transgenic Zebrafish Embryos	10.1016/j.celrep.2012.08.015	no pluripotent stem cells/immortalization
Functional consequences of 17q21.31/WNT3-WNT9B amplification in hPSCs with respect to neural differentiation	10.1016/j.celrep.2014.12.050	wrong cell type
The transcription factor BCL11A defines distinct subsets of midbrain dopaminergic neurons	10.1016/j.celrep.2021.109697	wrong cell type
Renal organoid modeling of tuberous sclerosis complex reveals lesion features arise from diverse developmental processes	10.1016/j.celrep.2022.111048	non-homogenous
Macrophages enhance contractile force in iPSC-derived human engineered cardiac tissue	10.1016/j.celrep.2024.114302	wrong cell type
Quantitative sudomotor test helps differentiate transthyretin familial amyloid polyneuropathy from chronic inflammatory demyelinating polyneuropathy	10.1016/j.clinph.2020.01.022	wrong publication type
Tuning the cell fate of neurons and glia by microRNAs	10.1016/j.conb.2013.08.002	wrong publication type
Reprogramming neurodegeneration in the big data era	10.1016/j.conb.2017.12.015	wrong publication type
Neuronal replacement: Concepts, achievements, and call for caution	10.1016/j.conb.2021.03.014	wrong publication type
Stem cells for GI motility disorders	10.1016/j.coph.2011.09.004	wrong publication type
Stem cell therapy in severe pediatric motility disorders	10.1016/j.coph.2018.09.004	wrong publication type
Enteric Nervous System: lessons from neurogenesis for reverse engineering and disease modelling and treatment	10.1016/j.coph.2020.02.001	wrong publication type
Physiology of cardiac development: from genetics to signaling to therapeutic strategies	10.1016/j.cophys.2017.09.002	wrong publication type
Leukemia inhibitory factor (LIF)	10.1016/j.cytogfr.2015.07.001	wrong publication type
Twist factor regulation of non-cardiomyocyte cell lineages in the developing heart	10.1016/j.diff.2012.03.002	wrong publication type
Directed differentiation of periocular mesenchyme from human embryonic stem cells	10.1016/j.diff.2017.11.003	wrong cell type
Chromosome 22q11.2 deletion causes PERK-dependent vulnerability in dopaminergic neurons	10.1016/j.ebiom.2020.103138	wrong cell type
Human coculture model of astrocytes and SH-SY5Y cells to test the neurotoxicity of chemicals	10.1016/j.ecoenv.2023.115912	wrong cell type
Experimental modelling of Alzheimer's disease for therapeutic screening	10.1016/j.ejmcr.2022.100044	wrong publication type
Pharmacology profile of F17464, a dopamine D<inf>3</inf> receptor preferential antagonist	10.1016/j.ejphar.2020.173635	wrong cell type
Impairment of human dopaminergic neurons at different developmental stages by perfluoro-octanoic acid (PFOA) and differential human brain areas accumulation of perfluoroalkyl chemicals	10.1016/j.envint.2021.106982	wrong cell type
Pre-differentiation exposure of PFOA induced persistent changes in DNA methylation and mitochondrial morphology in human dopaminergic-like neurons	10.1016/j.envpol.2022.119684	wrong cell type
Transplantable midbrain dopamine neurons: A moving target	10.1016/j.expneurol.2009.12.028	wrong publication type
Slit and Semaphorin signaling governed by Islet transcription factors positions motor neuron somata within the neural tube	10.1016/j.expneurol.2015.03.024	non-human
Development of 3D culture models of plexiform neurofibroma and initial application for phenotypic characterization and drug screening	10.1016/j.expneurol.2017.10.012	wrong cell type
N-acetylcysteine amide ameliorates mitochondrial dysfunction and reduces oxidative stress in hiPSC-derived dopaminergic neurons with POLG mutation	10.1016/j.expneurol.2020.113536	wrong cell type
Age-related loss of axonal regeneration is reflected by the level of local translation	10.1016/j.expneurol.2020.113594	wrong cell type
Recent advances for using human induced-pluripotent stem cells as pain-in-a-dish models of neuropathic pain	10.1016/j.expneurol.2022.114223	wrong publication type
Neurogenic effect of vascular endothelial growth factor during germ layer formation of human embryonic stem cells	10.1016/j.febslet.2006.09.053	wrong cell type
The pancreatic beta-cell in the islet and organ community	10.1016/j.gde.2009.07.003	wrong publication type
Onset of rosette formation during spontaneous neural differentiation of hESC and hiPSC colonies	10.1016/j.gene.2013.07.101	wrong cell type
Characterization of soluble <i>N</i>-ethylmaleimide-sensitive factor attachment protein receptor gene <i>STX18</i> variations for possible roles in congenital heart diseases	10.1016/j.gene.2016.10.043	wrong publication type
Cellular pathophysiology of Friedreich's ataxia cardiomyopathy	10.1016/j.ijcard.2021.11.033	wrong publication type
Oligodendrogenesis from neural stem cells: perspectives for remyelinating strategies	10.1016/j.ijdevneu.2013.01.004	wrong publication type
Abnormalities in static and dynamic intrinsic neural activity and neurotransmitters in first-episode OCD	10.1016/j.jad.2024.07.123	no pluripotent stem cells/immortalization
Provenance of sedimentary kaolin deposits in Egypt: Evidences from the Pb, Sr and Nd isotopes	10.1016/j.jafrearsci.2014.08.003	wrong publication type
Induced pluripotent stem (iPS) cells: A new source for cell-based therapeutics?	10.1016/j.jconrel.2014.04.011	wrong publication type
Optimizing dopaminergic differentiation of pluripotent stem cells for the manufacture of dopaminergic neurons for transplantation	10.1016/j.jcyt.2013.03.006	wrong cell type
Illustrating the potency of current Good Manufacturing Practice-compliant induced pluripotent stem cell lines as a source of multiple cell lineages using standardized protocols	10.1016/j.jcyt.2018.03.037	wrong cell type
eQTL studies: from bulk tissues to single cells	10.1016/j.jgg.2023.05.003	wrong publication type
Sensory Nerve Sprouting into Human Skin Explants Confers Improved Survival to Merkel Cells Independent of Merkel Cell-Neurite Complexes	10.1016/j.jid.2023.02.016	wrong cell type
Directed differentiation of basal forebrain cholinergic neurons from human pluripotent stem cells	10.1016/j.jneumeth.2016.03.017	wrong cell type
Unmasking the true identity in neuron differentiation	10.1016/j.jneumeth.2016.06.022	wrong publication type
Derivation of phenotypically diverse neural culture from hESC by combining adherent and dissociation methods	10.1016/j.jneumeth.2018.07.005	wrong cell type
Simple CaroTID-VasC score to predict one-year risk of stroke in symptomatic carotid stenosis patients	10.1016/j.jns.2023.120578	wrong publication type
Electrophysiological Analyses of Human Dorsal Root Ganglia and Human Induced Pluripotent Stem Cell-derived Sensory Neurons From Male and Female Donors	10.1016/j.jpain.2023.12.008	wrong cell type
Dynamic Changes in Erectile Function and Histological Architecture After Intracorporal Injection of Human Placental Stem Cells in a Pelvic Neurovascular Injury Rat Model	10.1016/j.jsxm.2019.12.002	no pluripotent stem cells/immortalization
Prospects for the application of mesenchymal stem cells in Alzheimer's disease treatment	10.1016/j.lfs.2019.116564	wrong publication type
Reprogramming the brain in and out of diseased states	10.1016/j.mcn.2020.103571	wrong publication type
Mitochondrial dysfunction characterized in human induced pluripotent stem cell disease models in MELAS syndrome: A brief summary	10.1016/j.mito.2023.08.003	wrong publication type
iPSC-derived neurons as a higher-throughput readout for autism: Promises and pitfalls	10.1016/j.molmed.2013.11.004	wrong publication type
iPSCs and DRGs: stepping stones to new pain therapies	10.1016/j.molmed.2021.11.005	wrong cell type
iPSC-derived models for anorexia nervosa research	10.1016/j.molmed.2024.02.006	wrong publication type
An optimized experimental strategy for efficient conversion of embryonic stem (ES)-derived mouse neural stem (NS) cells into a nearly homogeneous mature neuronal population	10.1016/j.nbd.2009.02.007	non-human
Contribution of induced pluripotent stem cell technologies to the understanding of cellular phenotypes in schizophrenia	10.1016/j.nbd.2018.04.021	wrong publication type
Organophosphate pesticide chlorpyrifos impairs STAT1 signaling to induce dopaminergic neurotoxicity: Implications for mitochondria mediated oxidative stress signaling events	10.1016/j.nbd.2018.05.019	wrong cell type
Nicotine prevents alpha-synuclein accumulation in mouse and human iPSC-derived dopaminergic neurons through activation of the dopamine D3- acetylcholine nicotinic receptor heteromer	10.1016/j.nbd.2019.04.017	wrong cell type
Brunner syndrome associated MAOA mutations result in NMDAR hyperfunction and increased network activity in human dopaminergic neurons	10.1016/j.nbd.2021.105587	wrong cell type
Liver-X-receptor agonists rescue axonal degeneration in SPG11-deficient neurons via regulating cholesterol trafficking	10.1016/j.nbd.2023.106293	wrong cell type
Combined cardiovascular and sweating autonomic testing to differentiate multiple system atrophy from Parkinson's disease	10.1016/j.neucli.2017.11.003	wrong publication type
Evaluation of the rotenone-induced activation of the Nrf2 pathway in a neuronal model derived from human induced pluripotent stem cells	10.1016/j.neuint.2016.09.004	non-homogenous
Nrf2 pathway activation upon rotenone treatment in human iPSC-derived neural stem cells undergoing differentiation towards neurons and astrocytes	10.1016/j.neuint.2017.06.006	wrong cell type
Generation of dopaminergic neurons in vitro from human embryonic stem cells treated with neurotrophic factors	10.1016/j.neulet.2004.01.073	wrong cell type
Generation of region-specific and high-purity neurons from human feeder-free iPSCs	10.1016/j.neulet.2021.135676	wrong cell type
Mini-Review: Induced pluripotent stem cells and the search for new cell-specific ALS therapeutic targets	10.1016/j.neulet.2021.135911	wrong publication type
Modeling enteric glia development, physiology and disease using human pluripotent stem cells	10.1016/j.neulet.2023.137334	wrong publication type
Huntington's disease associated resistance to Mn neurotoxicity is neurodevelopmental stage and neuronal lineage dependent	10.1016/j.neuro.2019.09.007	wrong cell type
Prior MDMA (Ecstasy) use is associated with increased basal ganglia-thalamocortical circuit activation during motor task performance in humans: An fMRI study	10.1016/j.neuroimage.2009.02.029	wrong publication type
Neural Correlates of Pain-Autonomic Coupling in Patients With Complex Regional Pain Syndrome Treated by Repetitive Transcranial Magnetic Stimulation of the Motor Cortex	10.1016/j.neurom.2023.05.005	wrong publication type
Coordinated actions of the Forkhead protein Foxp1 and Hox proteins in the columnar organization of spinal motor neurons	10.1016/j.neuron.2008.06.025	wrong cell type
Upgrading the Physiological Relevance of Human Brain Organoids	10.1016/j.neuron.2020.08.029	wrong publication type
Excessive release of inorganic polyphosphate by ALS/FTD astrocytes causes non-cell-autonomous toxicity to motoneurons	10.1016/j.neuron.2022.02.010	wrong cell type
Purinergic receptors in embryonic and adult neurogenesis	10.1016/j.neuropharm.2015.10.008	wrong publication type
Modeling mechanisms of chemotherapy-induced peripheral neuropathy and chemotherapy transport using induced pluripotent stem cell-derived sensory neurons	10.1016/j.neuropharm.2024.110062	wrong cell type
A Review of Stem Cell Therapy for Acquired Brain Injuries and Neurodegenerative Central Nervous System Diseases	10.1016/j.pmrj.2018.07.008	wrong publication type
Scientific and ethical issues related to stem cell research and interventions in neurodegenerative disorders of the brain	10.1016/j.pneurobio.2013.04.003	wrong publication type
Directing neuronal cell fate in vitro: Achievements and challenges	10.1016/j.pneurobio.2018.04.003	wrong publication type
The prefrontal cortex as a target for atypical antipsychotics in schizophrenia, lessons of neurodevelopmental animal models	10.1016/j.pneurobio.2020.101967	wrong publication type
Microfluidic chip for label-free removal of teratoma-forming cells from therapeutic human stem cells	10.1016/j.regen.2020.100030	wrong cell type
A decade of progress: Achievements and future challenges for regenerative medicine research in the United Kingdom	10.1016/j.regen.2024.100078	wrong publication type
Neural crest related gene transcript regulation by valproic acid analogues in the cardiac embryonic stem cell test	10.1016/j.reprotox.2019.08.013	wrong cell type
Quality criteria for in vitro human pluripotent stem cell-derived models of tissue-based cells	10.1016/j.reprotox.2022.06.003	wrong publication type
Mineralogy and geochemistry of clay fractions from different saprolites, Egypt: implications for the source of sedimentary kaolin deposits	10.1016/j.rgg.2014.11.001	wrong publication type
Mitochondrial multifaceted dysfunction in schizophrenia; complex I as a possible pathological target	10.1016/j.schres.2016.10.022	wrong publication type
Cell line specific alterations in genes associated with dopamine metabolism and signaling in midbrain dopaminergic neurons derived from 22q11.2 deletion carriers with elevated dopamine synthesis capacity	10.1016/j.schres.2022.05.010	wrong cell type
EZ spheres: A stable and expandable culture system for the generation of pre-rosette multipotent stem cells from human ESCs and iPSCs	10.1016/j.scr.2013.01.009	wrong cell type
Alginate microcapsule as a 3D platform for the efficient differentiation of human embryonic stem cells to dopamine neurons	10.1016/j.scr.2013.06.005	wrong cell type
Stepwise, non-adherent differentiation of human pluripotent stem cells to generate basal forebrain cholinergic neurons via hedgehog signaling	10.1016/j.scr.2013.08.002	wrong cell type
CXCR4 and CXCR7 play distinct roles in cardiac lineage specification and pharmacologic beta-adrenergic response	10.1016/j.scr.2017.06.015	wrong cell type
Derivation and characterization of the NYSCFe003-A human embryonic stem cell line	10.1016/j.scr.2017.10.017	non-homogenous
Application of CRISPR/Cas9 editing and digital droplet PCR in human iPSCs to generate novel knock-in reporter lines to visualize dopaminergic neurons	10.1016/j.scr.2019.101656	wrong cell type
Generation and characterization of iPSC lines (BGUi004-A, BGUi005-A) from two identical twins with polyalanine expansion in the paired-like homeobox 2B (<i>PHOX2B</i>) gene	10.1016/j.scr.2020.101955	wrong cell type
Modeling tumors of the peripheral nervous system associated with Neurofibromatosis type 1: Reprogramming plexiform neurofibroma cells	10.1016/j.scr.2020.102068	wrong publication type
Cores laboratories: Organization for stem cell technology advancement	10.1016/j.scr.2021.102266	wrong publication type
Generation and characterization of iPSC lines (BCH001) from a boy with intron 14 mutation in the ret proto-oncogene (RET) gene	10.1016/j.scr.2021.102359	wrong cell type
Generation of two hiPSC lines (UMILi027-A and UMILi028-A) from early and late-onset Congenital Central hypoventilation Syndrome (CCHS) patients carrying a polyalanine expansion mutation in the PHOX2B gene	10.1016/j.scr.2022.102781	wrong cell type
Generation of homozygous PRKN, PINK1 and double PINK1/PRKN knockout cell lines from healthy induced pluripotent stem cells using CRISPR/Cas9 editing	10.1016/j.scr.2022.102806	wrong cell type
Combinatorial signaling in the heart orchestrates cardiac induction, lineage specification and chamber formation	10.1016/j.semcdb.2006.12.003	wrong publication type
Cardiac progenitors and paracrine mediators in cardiogenesis and heart regeneration	10.1016/j.semcdb.2019.10.011	wrong publication type
On the evolutionary origins and regionalization of the neural crest	10.1016/j.semcdb.2022.06.008	wrong publication type
Novel beta-glucocerebrosidase chaperone compounds identified from cell-based screening reduce pathologically accumulated glucosylsphingosine in iPS-derived neuronal cells	10.1016/j.slasd.2023.06.002	wrong cell type
3D-Suspension culture platform for high throughput screening of neurotoxic chemicals using LUHMES dopaminergic neurons	10.1016/j.slasd.2024.01.004	wrong cell type
Isolation and Production of Cells Suitable for Human Therapy: Challenges Ahead	10.1016/j.stem.2008.11.012	wrong publication type
Clinical translation of stem cells in neurodegenerative disorders	10.1016/j.stem.2012.01.009	wrong publication type
How can human pluripotent stem cells help decipher and cure huntington's disease?	10.1016/j.stem.2012.07.015	wrong publication type
Epigenetic Regulation of Phosphodiesterases 2A and 3A Underlies Compromised beta-Adrenergic Signaling in an iPSC Model of Dilated Cardiomyopathy	10.1016/j.stem.2015.04.020	wrong cell type
Midbrain-like Organoids from Human Pluripotent Stem Cells Contain Functional Dopaminergic and Neuromelanin-Producing Neurons	10.1016/j.stem.2016.07.005	wrong cell type
Neural Differentiation in the Third Dimension: Generating a Human Midbrain	10.1016/j.stem.2016.07.017	wrong publication type
Created of Warm Blood and Nerves: Restoring an Enteric Nervous System in Organoids	10.1016/j.stem.2016.12.012	wrong publication type
Human iPSC-Derived Neural Progenitors Are an Effective Drug Discovery Model for Neurological mtDNA Disorders	10.1016/j.stem.2016.12.013	wrong cell type
Looking Back: Disease Modeling	10.1016/j.stem.2017.05.006	wrong publication type
A Human Pluripotent Stem Cell-based Platform to Study SARS-CoV-2 Tropism and Model Virus Infection in Human Cells and Organoids	10.1016/j.stem.2020.06.015	wrong cell type
Activation of HERV-K(HML-2) disrupts cortical patterning and neuronal differentiation by increasing NTRK3	10.1016/j.stem.2021.04.009	wrong cell type
Functional human gastrointestinal organoids can be engineered from three primary germ layers derived separately from pluripotent stem cells	10.1016/j.stem.2021.10.010	wrong cell type
Modeling human multi-lineage heart field development with pluripotent stem cells	10.1016/j.stem.2022.08.007	wrong cell type
A reference human induced pluripotent stem cell line for large-scale collaborative studies	10.1016/j.stem.2022.11.004	wrong cell type
hPSC-derived sacral neural crest enables rescue in a severe model of Hirschsprung's disease	10.1016/j.stem.2023.02.003	wrong cell type
Mapping of clonal lineages across developmental stages in human neural differentiation	10.1016/j.stem.2023.02.007	wrong cell type
Derivation and Expansion of PAX7-Positive Muscle Progenitors from Human and Mouse Embryonic Stem Cells	10.1016/j.stemcr.2014.07.001	wrong cell type
Long-term safety issues of iPSC-based cell therapy in a spinal cord injury model: Oncogenic transformation with epithelial-mesenchymal transition	10.1016/j.stemcr.2015.01.006	wrong publication type
KeyGenes, a Tool to Probe Tissue Differentiation Using a Human Fetal Transcriptional Atlas	10.1016/j.stemcr.2015.05.002	wrong publication type
ESC-derived basal forebrain cholinergic neurons ameliorate the cognitive symptoms associated with Alzheimer's disease in mouse models	10.1016/j.stemcr.2015.09.010	wrong cell type
Wnt/β-Catenin Stimulation and Laminins Support Cardiovascular Cell Progenitor Expansion from Human Fetal Cardiac Mesenchymal Stromal Cells	10.1016/j.stemcr.2016.02.014	wrong cell type
GAPTrap: A Simple Expression System for Pluripotent Stem Cells and Their Derivatives	10.1016/j.stemcr.2016.07.015	wrong cell type
Development and Dynamic Regulation of Mitochondrial Network in Human Midbrain Dopaminergic Neurons Differentiated from iPSCs	10.1016/j.stemcr.2016.08.014	wrong cell type
Patient iPSC-Derived Neurons for Disease Modeling of Frontotemporal Dementia with Mutation in CHMP2B	10.1016/j.stemcr.2017.01.012	wrong cell type
Accreditation of Biosafe Clinical-Grade Human Embryonic Stem Cells According to Chinese Regulations	10.1016/j.stemcr.2017.04.017	wrong cell type
Neural Crest Cell Implantation Restores Enteric Nervous System Function and Alters the Gastrointestinal Transcriptome in Human Tissue-Engineered Small Intestine	10.1016/j.stemcr.2017.07.017	non-homogenous
Differentiation of Human Induced Pluripotent or Embryonic Stem Cells Decreases the DNA Damage Repair by Homologous Recombination	10.1016/j.stemcr.2017.10.002	wrong cell type
Altered Differentiation Potential of Gaucher's Disease iPSC Neuronal Progenitors due to Wnt/beta-Catenin Downregulation	10.1016/j.stemcr.2017.10.029	wrong cell type
Astrocytes Attenuate Mitochondrial Dysfunctions in Human Dopaminergic Neurons Derived from iPSC	10.1016/j.stemcr.2017.12.021	wrong cell type
Mitochondrial Dysregulation and Impaired Autophagy in iPSC-Derived Dopaminergic Neurons of Multiple System Atrophy	10.1016/j.stemcr.2018.09.007	wrong cell type
Transcriptional Profiling of Xenogeneic Transplants: Examining Human Pluripotent Stem Cell-Derived Grafts in the Rodent Brain	10.1016/j.stemcr.2019.10.001	wrong publication type
Retinoic Acid Accelerates the Specification of Enteric Neural Progenitors from In-Vitro-Derived Neural Crest	10.1016/j.stemcr.2020.07.024	wrong cell type
Derivation of Peripheral Nociceptive, Mechanoreceptive, and Proprioceptive Sensory Neurons from the same Culture of Human Pluripotent Stem Cells	10.1016/j.stemcr.2021.01.001	wrong cell type
Efficient generation of dopaminergic induced neuronal cells with midbrain characteristics	10.1016/j.stemcr.2021.05.017	wrong publication type
Lesch-Nyhan disease causes impaired energy metabolism and reduced developmental potential in midbrain dopaminergic cells	10.1016/j.stemcr.2021.06.003	wrong cell type
Generation of caudal-type serotonin neurons and hindbrain-fate organoids from hPSCs	10.1016/j.stemcr.2021.06.006	wrong cell type
Expression dynamics of HAND1/2 in <i>in vitro</i> human cardiomyocyte differentiation	10.1016/j.stemcr.2021.06.014	wrong cell type
Making neurons, made easy: The use of Neurogenin-2 in neuronal differentiation	10.1016/j.stemcr.2021.11.015	wrong publication type
Physiological calcium combined with electrical pacing accelerates maturation of human engineered heart tissue	10.1016/j.stemcr.2022.07.006	wrong cell type
Development of a platform to investigate long-term potentiation in human iPSC-derived neuronal networks	10.1016/j.stemcr.2022.07.012	wrong cell type
Generation of a TPH2-EGFP reporter cell line for purification and monitoring of human serotonin neurons in vitro and in vivo	10.1016/j.stemcr.2022.08.012	wrong cell type
Panning for gold: Purifying mesencephalic dopaminergic progenitors differentiated from human pluripotent stem cells	10.1016/j.stemcr.2022.09.002	wrong publication type
Interspecies chimerism with human embryonic stem cells generates functional human dopamine neurons at low efficiency	10.1016/j.stemcr.2023.11.009	wrong cell type
DeePhys: A machine learning-assisted platform for electrophysiological phenotyping of human neuronal networks	10.1016/j.stemcr.2023.12.008	wrong cell type
Requirement of a dopaminergic neuronal phenotype for toxicity of low concentrations of 1-methyl-4-phenylpyridinium to human cells	10.1016/j.taap.2009.07.027	wrong cell type
Rotenone exerts developmental neurotoxicity in a human brain spheroid model	10.1016/j.taap.2018.02.003	wrong cell type
Gene regulation by morpholines and piperidines in the cardiac embryonic stem cell test	10.1016/j.taap.2021.115781	wrong cell type
Laminins in Cellular Differentiation	10.1016/j.tcb.2019.10.001	wrong publication type
From stem cells to neurons and glia: a Soxist's view of neural development	10.1016/j.tins.2005.08.008	wrong publication type
Comparison of different in vitro cell models for the assessment of pesticide-induced dopaminergic neurotoxicity	10.1016/j.tiv.2017.07.030	wrong cell type
In vitro studies with renal proximal tubule cells show direct cytotoxicity of Androctonus australis hector scorpion venom triggered by oxidative stress, caspase activation and apoptosis	10.1016/j.toxicon.2016.07.012	non-human
Molecular neural crest cell markers enable discrimination of organophosphates in the murine cardiac embryonic stem cell test	10.1016/j.toxrep.2021.07.017	non-human
Experimental evidence of a limited impact of new-generation perfluoroalkyl substance C6O4 on differentiating human dopaminergic neurons from induced pluripotent stem cells	10.1016/j.toxrep.2022.12.006	wrong cell type
Physiological markers of traffic-related stress during active travel	10.1016/j.trf.2021.12.003	wrong publication type
Hematopoietic stem/progenitor involvement in retinal microvascular repair during diabetes: Implications for bone marrow rejuvenation	10.1016/j.visres.2017.06.016	wrong publication type
Frataxin deficiency disrupts mitochondrial respiration and pulmonary endothelial cell function	10.1016/j.vph.2023.107181	wrong cell type
Econazole selectively induces cell death in NF1-homozygous mutant tumor cells	10.1016/j.xcrm.2023.101309	wrong cell type
Somatic mutations alter the differentiation outcomes of iPSC-derived neurons	10.1016/j.xgen.2023.100280	wrong cell type
Schizophrenia-associated somatic copy-number variants from 12,834 cases reveal recurrent NRXN1 and ABCB11 disruptions	10.1016/j.xgen.2023.100356	wrong publication type
An Optimized Protocol for the Generation of Midbrain Dopamine Neurons under Defined Conditions	10.1016/j.xpro.2020.100065	wrong cell type
High-throughput generation of midbrain dopaminergic neuron organoids from reporter human pluripotent stem cells	10.1016/j.xpro.2021.100463	wrong cell type
A protocol to differentiate nociceptors, mechanoreceptors, and proprioceptors from human pluripotent stem cells	10.1016/j.xpro.2022.101187	wrong cell type
Transcriptomics of Hirschsprung disease patient-derived enteric neural crest cells reveals a role for oxidative phosphorylation	10.1016/j.xpro.2023.102198	wrong cell type
A protocol for the differentiation of human embryonic stem cells into midbrain dopaminergic neurons	10.1016/j.xpro.2023.102355	wrong cell type
Protocol for generating reproducible miniaturized controlled midbrain organoids	10.1016/j.xpro.2023.102451	non-homogenous
Optimized protocol for the generation of functional human induced-pluripotent-stem-cell-derived dopaminergic neurons	10.1016/j.xpro.2023.102486	wrong cell type
Wnt5a and Wnt11 inhibit the canonical Wnt pathway and promote cardiac progenitor development via the Caspase-dependent degradation of AKT	10.1016/j.ydbio.2014.11.015	wrong cell type
Inactivation of Geminin in neural crest cells affects the generation and maintenance of enteric progenitor cells, leading to enteric aganglionosis	10.1016/j.ydbio.2015.11.023	non-human
Neural crest stem cells and their potential therapeutic applications	10.1016/j.ydbio.2016.09.006	wrong publication type
Schwann cell precursor: a neural crest cell in disguise?	10.1016/j.ydbio.2018.02.008	wrong publication type
Fbxo2(VHC) mouse and embryonic stem cell reporter lines delineate in vitro-generated inner ear sensory epithelia cells and enable otic lineage selection and Cre-recombination	10.1016/j.ydbio.2018.08.013	wrong cell type
Heads or tails: making the spinal cord	10.1016/j.ydbio.2022.03.002	wrong publication type
Towards clinical applications of in vitro-derived axial progenitors	10.1016/j.ydbio.2022.06.006	wrong publication type
In vitro modeling of cranial placode differentiation: Recent advances, challenges, and perspectives	10.1016/j.ydbio.2023.11.009	wrong publication type
Generation of human cortical neurons from a new immortal fetal neural stem cell line	10.1016/j.yexcr.2006.11.001	non-homogenous
Tumor-associated primo vascular system is derived from xenograft, not host	10.1016/j.yexmp.2012.09.004	wrong cell type
SARS-CoV-2 hampers dopamine production in iPSC-derived dopaminergic neurons	10.1016/j.yexmp.2023.104874	wrong cell type
Androgen regulation of axon growth and neurite extension in motoneurons	10.1016/j.yhbeh.2008.01.014	wrong publication type
Embryonic and embryonic-like stem cells in heart muscle engineering	10.1016/j.yjmcc.2010.10.027	wrong publication type
Human embryonic stem cell-derived vascular smooth muscle cells in therapeutic neovascularisation	10.1016/j.yjmcc.2011.07.014	wrong publication type
Notch signaling and cardiac repair	10.1016/j.yjmcc.2012.03.007	wrong publication type
Differentiation of neural lineage cells from human pluripotent stem cells	10.1016/j.ymeth.2008.03.007	wrong publication type
In vitro modeling of the neurobiological effects of glucocorticoids: A review	10.1016/j.ynstr.2023.100530	wrong publication type
Immortalization of a human prostate stromal cell line using a recombinant retroviral approach	10.1016/S0022-5347(05)66987-X	wrong cell type
Morphological and electrical characteristics of postnatal hippocampal neurons in culture: the presence of bicuculline- and strychnine-sensitive IPSPs	10.1016/s0040-8166(98)80072-4	non-human
Development of a positive-negative selection procedure for gene targeting in fish cells	10.1016/s0044-8486(01)00811-0	non-human
Immunocytochemistry of myoepithelial cells in the salivary glands	10.1016/S0079-6336%2803%2980001-3	wrong publication type
Retinoic acid and the heart	10.1016/s0083-6729(06)75010-5	wrong publication type
Independent roles of SOCS-3 and SHP-2 in the regulation of neuronal gene expression by leukemia inhibitory factor	10.1016/s0169-328x(02)00452-7	wrong publication type
Serotonin transporter function is modulated by brain-derived neurotrophic factor (BDNF) but not nerve growth factor (NGF)	10.1016/S0197-0186%2899%2900122-9	no pluripotent stem cells/immortalization
Differential actions of neurotrophins on apoptosis mediated by the low affinity neurotrophin receptor p75(NTR) in immortalised neuronal cell lines	10.1016/s0197-0186(99)00098-4	non-human
Embryonic stem cells go dopaminergic	10.1016/S0896-6273(00)00079-9	wrong publication type
Glial fibrillary acidic protein splice variants in hepatic stellate cells - Expression and regulation	10.1016/S1016-8478(23)17595-9	wrong cell type
Uncommon primary mediastinal tumours	10.1016/S1470-2045%2804%2901385-3	wrong publication type
Emerging concepts in neural stem cell research: autologous repair and cell-based disease modelling	10.1016/S1474-4422%2809%2970202-9	wrong publication type
Painful and painless channelopathies	10.1016/s1474-4422(14)70024-9	wrong publication type
Induced pluripotent stem cells (iPSCs)-a new era of reprogramming	10.1016/S1673-8527%2809%2960060-6	wrong publication type
The Toxmatrix: Chemo-Genomic Profiling Identifies Interactions That Reveal Mechanisms of Toxicity	10.1021/acs.chemrestox.7b00290	wrong cell type
Integration of Magnetic-Field-Directed Self-Assembly-Based Cell Culture and Biosensing Platform for Improving hPSCs-Derived Neurons and Quantitative Detection of Neurotransmitter	10.1021/acsami.3c14213	wrong cell type
Gelator Length Precisely Tunes Supramolecular Hydrogel Stiffness and Neuronal Phenotype in 3D Culture	10.1021/acsbiomaterials.9b01585	wrong cell type
A Rationally Designed, General Strategy for Membrane Orientation of Photoinduced Electron Transfer-Based Voltage-Sensitive Dyes	10.1021/acschembio.6b00981	wrong cell type
Dopaminergic Neurons Differentiated from LRRK2 I1371V-Induced Pluripotent Stem Cells Display a Lower Yield, alpha-Synuclein Pathology, and Functional Impairment	10.1021/acschemneuro.2c00297	wrong cell type
Electrophysiological Monitoring of Neurochemical-Based Neural Signal Transmission in a Human Brain-Spinal Cord Assembloid	10.1021/acssensors.1c02279	wrong cell type
Multitarget drug design strategy: Quinone-tacrine hybrids designed to block amyloid-beta aggregation and to exert anticholinesterase and antioxidant effects	10.1021/jm5010804	wrong cell type
Comparative Proteomic Analysis of Primary Schwann Cells and a Spontaneously Immortalized Schwann Cell Line RSC 96: A Comprehensive Overview with a Focus on Cell Adhesion and Migration Related Proteins	10.1021/pr201221u	non-human
The athletes' ECG and the exercise related sudden cardiac death. [German]	10.1024/0040-5930/a000680	wrong publication type
IPSCs and small molecules: A reciprocal effort towards better approaches for drug discovery	10.1038/aps.2013.21	wrong publication type
Acetylcholine beyond neurons: The non-neuronal cholinergic system in humans	10.1038/bjp.2008.185	wrong publication type
Derivation of neural precursor cells from human ES cells at 3% O 2 is efficient, enhances survival and presents no barrier to regional specification and functional differentiation	10.1038/cdd.2010.171	wrong cell type
Notch1 signaling regulates chondrogenic lineage determination through <i>Sox9</i> activation	10.1038/cdd.2011.114	wrong cell type
Inhibition of apoptotic Bax translocation to the mitochondria is a central function of parkin	10.1038/cddis.2014.278	wrong cell type
Involvement of DNMT3B in the pathogenesis of Hirschsprung disease and its possible role as a regulator of neurogenesis in the human enteric nervous system	10.1038/gim.2014.17	wrong cell type
Stem cell therapy for cerebral ischemia: From basic science to clinical applications	10.1038/jcbfm.2011.187	wrong publication type
Reprogramming the kidney: A novel approach for regeneration	10.1038/ki.2012.68	wrong publication type
A practical guide to induced pluripotent stem cell research using patient samples	10.1038/labinvest.2014.104	wrong publication type
Abnormal neuronal differentiation and mitochondrial dysfunction in hair follicle-derived induced pluripotent stem cells of schizophrenia patients	10.1038/mp.2013.67	wrong cell type
Dopaminergic differentiation of schizophrenia hiPSCs	10.1038/mp.2014.194	wrong cell type
Generation of functional human serotonergic neurons from fibroblasts	10.1038/mp.2015.161	wrong cell type
Serotonergic neurons derived from induced pluripotent stem cells (iPSCs): A new pathway for research on the biology and pharmacology of major depression	10.1038/mp.2015.201	wrong publication type
Stem cell-derived interneuron transplants as a treatment for schizophrenia: preclinical validation in a rodent model	10.1038/mp.2016.121	wrong cell type
Characterization and transplantation of enteric neural crest cells from human induced pluripotent stem cells	10.1038/mp.2016.191	wrong cell type
Ketamine enhances structural plasticity in mouse mesencephalic and human iPSC-derived dopaminergic neurons via AMPAR-driven BDNF and mTOR signaling	10.1038/mp.2017.241	wrong cell type
Interventional magnetic resonance imaging-guided cell transplantation into the brain with radially branched deployment	10.1038/mt.2014.155	wrong cell type
Characterizing Human Stem Cell-derived Sensory Neurons at the Single-cell Level Reveals Their Ion Channel Expression and Utility in Pain Research	10.1038/mt.2014.86	wrong cell type
Elimination of proliferating cells from CNS grafts using a Ki67 promoter-driven thymidine kinase	10.1038/mtm.2016.69	wrong cell type
miR-145 and miR-143 regulate smooth muscle cell fate and plasticity	10.1038/nature08195	non-human
Reprogramming human endothelial cells to haematopoietic cells requires vascular induction	10.1038/nature13547	wrong cell type
Variation in the safety of induced pluripotent stem cell lines	10.1038/nbt.1554	non-human
Generation of human vascular smooth muscle subtypes provides insight into embryological origin-dependent disease susceptibility	10.1038/nbt.2107	wrong cell type
Smooth muscle diversity from human pluripotent cells	10.1038/nbt.2117	wrong cell type
Medial ganglionic eminence-like cells derived from human embryonic stem cells correct learning and memory deficits	10.1038/nbt.2565	wrong cell type
White matter from fibroblasts	10.1038/nbt.2570	wrong publication type
Modulating the stem cell niche for tissue regeneration	10.1038/nbt.2978	wrong publication type
Generation of serotonin neurons from human pluripotent stem cells	10.1038/nbt.3435	wrong cell type
Reprogramming the diseased brain	10.1038/nbt.3869	wrong publication type
Pathological roles of the VEGF/SphK pathway in Niemann-Pick type C neurons	10.1038/ncomms6514	wrong cell type
Engineered human pluripotent-stem-cell-derived intestinal tissues with a functional enteric nervous system	10.1038/nm.4233	wrong cell type
Automated, high-throughput derivation, characterization and differentiation of induced pluripotent stem cells	10.1038/nmeth.3507	wrong cell type
Stem cells: A dish of neurons	10.1038/nmeth.3927	wrong publication type
Opportunities and challenges of pluripotent stem cell neurodegenerative disease models	10.1038/nn.3425	wrong publication type
Multivalent ligands control stem cell behaviour in vitro and in vivo	10.1038/nnano.2013.205	wrong cell type
Generation of high-purity human ventral midbrain dopaminergic progenitors for in vitro maturation and intracerebral transplantation	10.1038/nprot.2017.078	wrong cell type
Human stem cells and drug screening: Opportunities and challenges	10.1038/nrd3000	wrong publication type
Current status of pluripotent stem cells: Moving the first therapies to the clinic	10.1038/nrd4738	wrong publication type
Pluripotent stem cells in regenerative medicine: Challenges and recent progress	10.1038/nrg3563	wrong publication type
Evaluating cell reprogramming, differentiation and conversion technologies in neuroscience	10.1038/nrn.2016.46	wrong publication type
Neural development: From floorplate to function	10.1038/nrn3157	wrong publication type
Epigenetic regulation of the neuroblastoma genes, Arid3b and Mycn	10.1038/onc.2012.285	non-human
Wnt signal activation induces midbrain specification through direct binding of the beta-catenin/TCF4 complex to the EN1 promoter in human pluripotent stem cells	10.1038/s12276-018-0044-y	wrong cell type
Brain organoids: a next step for humanized Alzheimer's disease models?	10.1038/s41380-018-0343-7	wrong publication type
Altered serotonergic circuitry in SSRI-resistant major depressive disorder patient-derived neurons	10.1038/s41380-019-0377-5	wrong cell type
The application of human pluripotent stem cells to model the neuronal and glial components of neurodevelopmental disorders	10.1038/s41380-019-0495-0	wrong publication type
Sensing serotonin secreted from human serotonergic neurons using aptamer-modified nanopipettes	10.1038/s41380-021-01066-5	wrong cell type
Induction of dopaminergic neurons for neuronal subtype-specific modeling of psychiatric disease risk	10.1038/s41380-021-01273-0	wrong cell type
Mispatterning and interneuron deficit in Tourette Syndrome basal ganglia organoids	10.1038/s41380-022-01880-5	wrong cell type
Differential DNA methylation in iPSC-derived dopaminergic neurons: a step forward on the role of SNORD116 microdeletion in the pathophysiology of addictive behavior in Prader-Willi syndrome	10.1038/s41380-024-02542-4	wrong cell type
Autism patient-derived SHANK2B<sup>Y29X</sup> mutation affects the development of ALDH1A1 negative dopamine neuron	10.1038/s41380-024-02578-6	wrong cell type
Induced pluripotent stem cells (iPSCs): molecular mechanisms of induction and applications	10.1038/s41392-024-01809-0	wrong publication type
Single-cell trajectory analysis of human homogenous neurons carrying a rare RELN variant	10.1038/s41398-018-0177-8	wrong cell type
CDK9 activity is critical for maintaining MDM4 overexpression in tumor cells	10.1038/s41419-020-02971-3	wrong cell type
SNORD116 and growth hormone therapy impact IGFBP7 in Prader-Willi syndrome	10.1038/s41436-021-01185-y	wrong cell type
Defining human cardiac transcription factor hierarchies using integrated single-cell heterogeneity analysis	10.1038/s41467-018-07333-4	wrong cell type
microRNA-33 maintains adaptive thermogenesis via enhanced sympathetic nerve activity	10.1038/s41467-021-21107-5	no pluripotent stem cells/immortalization
16p11.2 deletion is associated with hyperactivation of human iPSC-derived dopaminergic neuron networks and is rescued by RHOA inhibition in vitro	10.1038/s41467-021-23113-z	wrong cell type
Co-development of central and peripheral neurons with trunk mesendoderm in human elongating multi-lineage organized gastruloids	10.1038/s41467-021-23294-7	non-homogenous
Glucocerebrosidase is imported into mitochondria and preserves complex I integrity and energy metabolism	10.1038/s41467-023-37454-4	wrong cell type
Electrically-evoked oscillating calcium transients in mono- and co-cultures of iPSC glia and sensory neurons	10.1038/s41467-023-37928-5	wrong cell type
Single-cell allele-specific expression analysis reveals dynamic and cell-type-specific regulatory effects	10.1038/s41467-023-42016-9	wrong cell type
Enhanced production of mesencephalic dopaminergic neurons from lineage-restricted human undifferentiated stem cells	10.1038/s41467-023-43471-0	wrong cell type
Dynamic nucleolar phase separation influenced by non-canonical function of LIN28A instructs pluripotent stem cell fate decisions	10.1038/s41467-024-45451-4	wrong cell type
Production of human spinal-cord organoids recapitulating neural-tube morphogenesis	10.1038/s41551-022-00868-4	non-homogenous
Towards a better understanding of diabetes mellitus using organoid models	10.1038/s41574-022-00797-x	wrong publication type
Fresh perspectives on how to build, maintain and repair the ENS	10.1038/s41575-023-00870-4	wrong publication type
hiPSCs for predictive modelling of neurodegenerative diseases: dreaming the possible	10.1038/s41582-021-00465-0	wrong publication type
Neural crest origin of sympathetic neurons at the dawn of vertebrates	10.1038/s41586-024-07297-0	no pluripotent stem cells/immortalization
Epicardial cells derived from human embryonic stem cells augment cardiomyocyte-driven heart regeneration	10.1038/s41587-019-0197-9	wrong cell type
Population-scale single-cell RNA-seq profiling across dopaminergic neuron differentiation	10.1038/s41588-021-00801-6	wrong cell type
Dopamine metabolism by a monoamine oxidase mitochondrial shuttle activates the electron transport chain	10.1038/s41593-019-0556-3	wrong cell type
Derivation of enteric neuron lineages from human pluripotent stem cells	10.1038/s41596-019-0141-y	wrong cell type
Expansion of human midbrain floor plate progenitors from induced pluripotent stem cells increases dopaminergic neuron differentiation potential	10.1038/s41598-017-05633-1	wrong cell type
Resveratrol modulates cocaine-induced inhibitory synaptic plasticity in VTA dopamine neurons by inhibiting phosphodiesterases (PDEs)	10.1038/s41598-017-16034-9	no pluripotent stem cells/immortalization
Expression of neuropeptide Y is increased in an activated human HSC cell line	10.1038/s41598-019-45932-3	wrong cell type
Cell body shape and directional movement stability in human-induced pluripotent stem cell-derived dopaminergic neurons	10.1038/s41598-020-62598-4	wrong cell type
Identification of ASCL1 as a determinant for human iPSC-derived dopaminergic neurons	10.1038/s41598-021-01366-4	wrong cell type
Contributions of Na(V)1.8 and Na(V)1.9 to excitability in human induced pluripotent stem-cell derived somatosensory neurons	10.1038/s41598-021-03608-x	wrong cell type
Dynamic landscape of chromatin accessibility and transcriptomic changes during differentiation of human embryonic stem cells into dopaminergic neurons	10.1038/s41598-021-96263-1	wrong cell type
Exploring the neuroprotective potential of Nrf2-pathway activators against annonacin toxicity	10.1038/s41598-024-70837-1	wrong cell type
AAV-mediated editing of PMP22 rescues Charcot-Marie-Tooth disease type 1A features in patient-derived iPS Schwann cells	10.1038/s43856-023-00400-y	wrong cell type
A genome-wide CRISPR screen identifies BRD4 as a regulator of cardiomyocyte differentiation	10.1038/s44161-024-00431-1	wrong cell type
Automated and manual patch clamp data of human induced pluripotent stem cell-derived dopaminergic neurons	10.1038/sdata.2017.56	wrong cell type
Structural properties of phenylethylamine derivatives which inhibit transport-P in peptidergic neurones	10.1038/sj.bjp.0701894	wrong cell type
Human embryonic stem cells: A resource for in vitro neuroscience research?	10.1038/sj.npp.1301126	wrong publication type
Quantification of dopaminergic neuron differentiation and neurotoxicity via a genetic reporter	10.1038/srep25181	wrong cell type
Differential neuronal vulnerability identifies IGF-2 as a protective factor in ALS	10.1038/srep25960	wrong publication type
Dual delivery of siRNA and plasmid DNA using mesoporous silica nanoparticles to differentiate induced pluripotent stem cells into dopaminergic neurons	10.1039/c7tb00351j	wrong cell type
Compartmentalized microfluidic chambers enable long-term maintenance and communication between human pluripotent stem cell-derived forebrain and midbrain neurons	10.1039/d1lc00505g	wrong cell type
Tumour necrosis factor alpha enhances CCL2 and ICAM-1 expression in peripheral nerve microvascular endoneurial endothelial cells	10.1042/an20120048	non-human
Induced pluripotent stem cell-derived vascular smooth muscle cells: methods and application	10.1042/bj20141078	wrong publication type
P<inf>2</inf>-purinergic receptors regulate phospholipase C and adenylate cyclase activities in immortalized Schwann cells	10.1042/bj3140555	wrong cell type
Shaping axial identity during human pluripotent stem cell differentiation to neural crest cells	10.1042/bst20211152	wrong publication type
Label-free imaging of neurotransmitters in live brain tissue by multi-photon ultraviolet microscopy	10.1042/NS20180132	wrong publication type
Do foetal transplant studies continue to be justified in Huntington's disease?	10.1042/NS20210019	wrong publication type
Connexin43 is another gap junction protein in the peripheral nervous system	10.1046/j.1471-4159.1996.67031252.x	no pluripotent stem cells/immortalization
Apoptosis induced by differentiation or serum deprivation in an immortalized central nervous system neuronal cell line	10.1046/j.1471-4159.1996.67051908.x	non-human
An adenoviral vector-based system to study neuronal gene expression: Analysis of the rat tyrosine hydroxylase promoter in cultured neurons	10.1046/j.1471-4159.1997.68052152.x	non-human
In vitro induction of apoptosis or differentiation by dopamine in an immortalized olfactory neuronal cell line	10.1046/j.1471-4159.1997.69051870.x	wrong cell type
Enzymatic and molecular biological analysis of palmitoyl protein thioesterase deficiency in infantile neuronal ceroid lipofuscinosis	10.1046/j.1471-4159.1998.71010323.x	wrong cell type
Cytokine-induced cell death in immortalized Schwann cells: roles of nitric oxide and cyclic AMP	10.1046/j.1471-4159.2001.00358.x	wrong cell type
Human and mouse enteric nervous system neurosphere transplants regulate the function of aganglionic embryonic distal colon	10.1053/j.gastro.2008.03.035	no pluripotent stem cells/immortalization
Identification of Genes Associated With Hirschsprung Disease, Based on Whole-Genome Sequence Analysis, and Potential Effects on Enteric Nervous System Development	10.1053/j.gastro.2018.09.012	wrong cell type
Activation of Hedgehog Signaling Promotes Development of Mouse and Human Enteric Neural Crest Cells, Based on Single-Cell Transcriptome Analyses	10.1053/j.gastro.2019.08.019	wrong cell type
Brown adipose tissue: Research milestones of a potential player in human energy balance and obesity	10.1055/s-0033-1348264	wrong publication type
Myocardin-related transcription factor B is required in cardiac neural crest for smooth muscle differentiation and cardiovascular development	10.1073/pnas.0503741102	non-human
Requirement of myocardin-related transcription factor-B for remodeling of branchial arch arteries and smooth muscle differentiation	10.1073/pnas.0507346102	non-human
Gene-trapped mouse embryonic stem cell-derived cardiac myocytes and human genetics implicate AKAP10 in heart rhythm regulation	10.1073/pnas.0610393104	wrong cell type
The TrkC receptor induces apoptosis when the dependence receptor notion meets the neurotrophin paradigm	10.1073/pnas.0701243104	wrong cell type
Inhibition of pluripotent stem cell-derived teratoma formation by small molecules	10.1073/pnas.1303669110	wrong cell type
A fully defined and scalable 3D culture system for human pluripotent stem cell expansion and differentiation	10.1073/pnas.1309408110	wrong cell type
<i>cKit</i><SUP>+</SUP> cardiac progenitors of neural crest origin	10.1073/pnas.1517201112	wrong cell type
UTX-guided neural crest function underlies craniofacial features of Kabuki syndrome	10.1073/pnas.1705011114	non-human
Corepressor SMRT is required to maintain Hox transcriptional memory during somitogenesis	10.1073/pnas.1809480115	non-human
Specific modulation of dopamine expression in neuronal hybrid cells by primary cells from different brain regions	10.1073/pnas.89.19.8943	wrong cell type
CARDIOTROPHIN-1 - BIOLOGICAL-ACTIVITIES AND BINDING TO THE LEUKEMIA INHIBITORY FACTOR-RECEPTOR GP130 SIGNALING COMPLEX	10.1074/jbc.270.18.10915	non-human
MicroRNA-9 and microRNA-326 regulate human dopamine D2 receptor expression, and the microrna-mediated expression regulation is altered by a genetic variant	10.1074/jbc.M113.535203	wrong cell type
Multiple molecular determinants in the carboxyl terminus regulate dopamine transporter export from endoplasmic reticulum	10.1074/jbc.M312774200	wrong cell type
The potential for immunogenicity of autologous induced pluripotent stem cell-derived therapies	10.1074/jbc.R113.509588	wrong publication type
Small molecule screening in human induced pluripotent stem cell-derived terminal cell types	10.1074/jbc.R113.529156	wrong publication type
The role of visual presentation in cause-related marketing message processing in social network sites: a case for sports brands	10.1080/02650487.2021.1892963	wrong publication type
POLG mutations lead to abnormal mitochondrial remodeling during neural differentiation of human pluripotent stem cells via SIRT3/AMPK pathway inhibition	10.1080/15384101.2022.2044136	wrong cell type
Pluripotent stem cells for neurodegenerative disease modeling: an expert view on their value to drug discovery	10.1080/17460441.2020.1767579	wrong publication type
Bcl-2 inhibits retinoic acid-induced apoptosis during the neural differentiation of embryonal stem cells	10.1083/jcb.132.5.955	wrong cell type
REN: a novel, developmentally regulated gene that promotes neural cell differentiation	10.1083/jcb.200202024	non-human
ATG8-dependent LMX1B-autophagy crosstalk shapes human midbrain dopaminergic neuronal resilience	10.1083/jcb.201910133	wrong cell type
Development of an in situ injectable hydrogel containing hyaluronic acid for neural regeneration	10.1088/1748-605X/ab8c43	wrong cell type
3D bioprinted human iPSC-derived somatosensory constructs with functional and highly purified sensory neuron networks	10.1088/1758-5090/abff11	wrong cell type
Immunocompetent brain organoids-microglia enter the stage	10.1088/2516-1091/ac8dcf	wrong publication type
Impedance-based detection of beating rhythm and proarrhythmic effects of compounds on stem cell-derived cardiomyocytes	10.1089/adt.2011.0396	wrong cell type
Roles of reactive oxygen species in the fate of stem cells	10.1089/ars.2012.4963	wrong publication type
Heme Oxygenase-1/Carbon Monoxide System and Embryonic Stem Cell Differentiation and Maturation into Cardiomyocytes	10.1089/ars.2015.6342	wrong cell type
Directing human induced pluripotent stem cells into a neurosensory lineage for auditory neuron replacement	10.1089/biores.2014.0019	wrong cell type
Generation of Xeroderma Pigmentosum-A Patient-Derived Induced Pluripotent Stem Cell Line for Use As Future Disease Model	10.1089/cell.2014.0104	wrong cell type
In Vitro Induction of Human Embryonic Stem Cells into the Midbrain Dopaminergic Neurons and Transplantation in Cynomolgus Monkey	10.1089/cell.2019.0037	wrong cell type
Transcription Factor-Based Strategies to Generate Neural Cell Types from Human Pluripotent Stem Cells	10.1089/cell.2021.0045	wrong publication type
Common Genetic Variants of the <i>BMP4</i>, <i>BMPR1A</i>, <i>BMPR1B</i>, and <i>ACVR1</i> Genes, Left Ventricular Mass, and Other Parameters of the Heart in Newborns	10.1089/gtmb.2012.0164	wrong publication type
Cell replacement therapies: Is it time to reprogram?	10.1089/hum.2014.097	wrong publication type
NTera2: A model system to study dopaminergic differentiation of human embryonic stem cells	10.1089/scd.2005.14.517	wrong cell type
Optimized derivation and functional characterization of 5-HT neurons from human embryonic stem cells	10.1089/scd.2008.0181	wrong cell type
Stage-specific role for Shh in dopaminergic differentiation of human embryonic stem cells induced by stromal cells	10.1089/scd.2009.0107	wrong cell type
Milestones of directed differentiation of mouse and human embryonic stem cells into telencephalic neurons based on neural development in vivo	10.1089/scd.2010.0417	wrong publication type
Human induced pluripotent stem cells derived under feeder-free conditions display unique cell cycle and DNA replication gene profiles	10.1089/scd.2010.0440	wrong cell type
Overexpression of basic helix-loop-helix transcription factors enhances neuronal differentiation of fetal human neural progenitor cells in various ways	10.1089/scd.2011.0079	no pluripotent stem cells/immortalization
Enhanced production of neuroprogenitors, dopaminergic neurons, and identification of target genes by overexpression of sonic hedgehog in human embryonic stem cells	10.1089/scd.2011.0134	wrong cell type
Chromatin insulator elements block transgene silencing in engineered human embryonic stem cell lines at a defined chromosome 13 locus	10.1089/scd.2011.0163	wrong cell type
Dopamine receptors in human embryonic stem cell neurodifferentiation	10.1089/scd.2012.0150	wrong cell type
Detailed expression analysis of regulatory genes in the early developing human neural tube	10.1089/scd.2013.0309	wrong cell type
Functional roles of Nurr1, Pitx3, and Lmx1a in neurogenesis and phenotype specification of dopamine neurons during in vitro differentiation of embryonic stem cells	10.1089/scd.2013.0406	wrong cell type
Genome wide profiling of dopaminergic neurons derived from human embryonic and induced pluripotent stem cells	10.1089/scd.2013.0412	wrong cell type
Isolation and Transplantation of Corneal Endothelial Cell-Like Cells Derived from In-Vitro-Differentiated Human Embryonic Stem Cells	10.1089/scd.2013.0510	wrong cell type
Differential Expression of Cholinergic System Components in Human Induced Pluripotent Stem Cells, Bone Marrow-Derived Multipotent Stromal Cells, and Induced Pluripotent Stem Cell-Derived Multipotent Stromal Cells	10.1089/scd.2017.0162	wrong cell type
Simulated Microgravity Impairs Cardiac Autonomic Neurogenesis from Neural Crest Cells	10.1089/scd.2017.0265	non-human
Doxycycline Masks the Genuine Effect of the Doxycycline-Inducible Transgene by Promoting Dopaminergic Neuron Differentiation from Human Pluripotent Stem Cells	10.1089/scd.2018.0209	wrong cell type
Coating Materials for Neural Stem/Progenitor Cell Culture and Differentiation	10.1089/scd.2019.0288	wrong publication type
Delineating the Neuropathology of Lysosomal Storage Diseases Using Patient-Derived Induced Pluripotent Stem Cells	10.1089/scd.2021.0304	wrong publication type
Rapid Conversion of Human Induced Pluripotent Stem Cells into Dopaminergic Neurons by Inducible Expression of Two Transcription Factors	10.1089/scd.2021.0363	wrong cell type
Impaired SHH responsiveness of induced pluripotent stem cell-derived floor plate cells carrying the LRRK2 I1371V mutation contributes to the ontogenic origin of lower dopaminergic-neuron yield	10.1089/scd.2023.0283	wrong cell type
Modeling human neural functionality in vitro: Three-dimensional culture for dopaminergic differentiation	10.1089/ten.tea.2014.0079	wrong cell type
MuDCoD: multi-subject community detection in personalized dynamic gene networks from single-cell RNA sequencing	10.1093/bioinformatics/btad592	wrong cell type
Aromatic l-amino acid decarboxylase deficiency: A patient-derived neuronal model for precision therapies	10.1093/brain/awab123	wrong cell type
Stem cell-derived sensory neurons modelling inherited erythromelalgia: normalization of excitability	10.1093/brain/awac031	wrong cell type
Downregulation of PMP22 ameliorates myelin defects in iPSC-derived human organoid cultures of CMT1A	10.1093/brain/awac475	non-homogenous
Epileptogenesis in tuberous sclerosis complex-related developmental and epileptic encephalopathy	10.1093/brain/awad048	wrong publication type
PMP22 duplication dysregulates lipid homeostasis and plasma membrane organization in developing human Schwann cells	10.1093/brain/awae158	wrong cell type
Functional and structural adaptations of the coronary macro- and microvasculature to regular aerobic exercise by activation of physiological, cellular, and molecular mechanisms: ESC Working Group on Coronary Pathophysiology and Microcirculation position paper	10.1093/cvr/cvab246	wrong publication type
Cellular interplay between cardiomyocytes and non-myocytes in diabetic cardiomyopathy	10.1093/cvr/cvac049	wrong publication type
STRA6 is essential for induction of vascular smooth muscle lineages in human embryonic cardiac outflow tract development	10.1093/cvr/cvad010	wrong cell type
Serum-free differentiation of functional human coronary-like vascular smooth muscle cells from embryonic stem cells	10.1093/cvr/cvs357	wrong cell type
An endogenous cholinergic system controls electrical conduction in the heart	10.1093/eurheartj/ehae699	wrong cell type
Cardioneuroablation for the treatment of reflex syncope and functional bradyarrhythmias: A Scientific Statement of the European Heart Rhythm Association (EHRA) of the ESC, the Heart Rhythm Society (HRS), the Asia Pacific Heart Rhythm Society (APHRS) and the Latin American Heart Rhythm Society (LA...	10.1093/europace/euae206	wrong publication type
Inhibition of excessive mitochondrialfissionreduced aberrant autophagy and neuronal damage caused by LRRK2 G2019S mutation	10.1093/hmg/ddt301	wrong cell type
Dynamic changes in DNA methylation and hydroxymethylation when hES cells undergo differentiation toward a neuronal lineage	10.1093/hmg/ddt453	wrong cell type
IKK beta and mutant huntingtin interactions regulate the expression of IL-34: Implications for microglialmediated neurodegeneration in HD	10.1093/hmg/ddx315	wrong cell type
Impaired mitochondrial dynamics underlie axonal defects in hereditary spastic paraplegias	10.1093/hmg/ddy156	wrong publication type
PD-linked CHCHD2 mutations impair CHCHD10 and MICOS complex leading to mitochondria dysfunction	10.1093/hmg/ddy413	wrong cell type
Blunted autonomic reactivity to pharmacological panic challenge under long-term escitalopram treatment in healthy men	10.1093/ijnp/pyu053	wrong publication type
Regulating Wnt signaling: A strategy to prevent neurodegeneration and induce regeneration	10.1093/jmcb/mju002	wrong publication type
Intracellular calcium dysregulation in heart and brain diseases: Insights from induced pluripotent stem cell studies	10.1093/jnen/nlae078	wrong publication type
DICE, an efficient system for iterative genomic editing in human pluripotent stem cells	10.1093/nar/gkt1290	wrong cell type
Modeling schizophrenia using induced pluripotent stem cell-derived and fibroblast-induced neurons	10.1093/schbul/sbs127	wrong cell type
Evaluation of Novel High-Throughput Embryonic Stem Cell Tests with New Molecular Markers for Screening Embryotoxic Chemicals <i>In Vitro</i>	10.1093/toxsci/kfr250	wrong cell type
The endometrium as a source of mesenchymal stem cells for regenerative medicine	10.1095/biolreprod.114.126771	wrong publication type
Human polymorphisms in nicotinic receptors: A functional analysis in iPS-derived dopaminergic neurons	10.1096/fj.201600932R	wrong cell type
GNAO1 organizes the cytoskeletal remodeling and firing of developing neurons	10.1096/fj.202001113R	non-homogenous
Dantrolene Ameliorates Impaired Neurogenesis and Synaptogenesis in Induced Pluripotent Stem Cell Lines Derived from Patients with Alzheimer's Disease	10.1097/ALN.0000000000003224	wrong cell type
Acquired Primary Cutaneous Ganglioneuroma With Adipocytic Metaplasia: "An End Point of Melanocytic 'Maturation'?" A Case Report and Meta-Analysis With Comparison to a Cross-Sectional Study of Neurotized Melanocytic Nevi	10.1097/DAD.0b013e3181e448cb	no pluripotent stem cells/immortalization
Peripheral afferents and the pain experience	10.1097/j.pain.0000000000001527	wrong publication type
Neurofilament light chain as a biomarker of axonal damage in sensory neurons and paclitaxel-induced peripheral neuropathy in ovarian cancer patients	10.1097/j.pain.0000000000002840	wrong cell type
Enteric nervous system neuropathy: repair and restoration	10.1097/MOG.0b013e328342a6ea	wrong publication type
Advances in stem cell research for the treatment of male sexual dysfunctions	10.1097/MOU.0000000000000255	wrong publication type
Establishment of an induced pluripotent stem cell model of Hirschsrpung disease, a congenital condition of the enteric nervous system, from a patient carrying a novel RET mutation	10.1097/wnr.0000000000001070	wrong cell type
(2 R,6 R)-Hydroxynorketamine promotes dendrite outgrowth in human inducible pluripotent stem cell-derived neurons through AMPA receptor with timing and exposure compatible with ketamine infusion pharmacokinetics in humans	10.1097/WNR.0000000000001131	wrong cell type
Ketamine increases the expression of GluR1 and GluR2 alpha-amino-3-hydroxy-5-methy-4-isoxazole propionate receptor subunits in human dopaminergic neurons differentiated from induced pluripotent stem cells	10.1097/WNR.0000000000001185	wrong cell type
Human iPSC derived cardiac myocytes and sympathetic neurons in disease modeling	10.1098/rstb.2022.0173	wrong publication type
hPSC-Derived Enteric Ganglioids Model Human ENS Development and Function	10.1101/2022.01.04.474746	wrong cell type
TET1 potentiates human iPS cell reprogramming by rectifying extraembryonic gene noises	10.1101/2022.04.29.489839	wrong cell type
Polyalanine disease mutations impair UBA6-dependent ubiquitination	10.1101/2022.06.20.496786	wrong publication type
Paclitaxel- and vincristine-induced neurotoxicity and drug transport in sensory neurons	10.1101/2023.02.07.527432	wrong cell type
Isolation of human pluripotent stem cell-derived sensory neuron subtypes by immunopanning	10.1101/2023.03.06.531220	wrong cell type
Inhibition of muscarinic receptor signaling protects human enteric inhibitory neurons against platin chemotherapy toxicity	10.1101/2023.03.08.531806	wrong cell type
Scalable projected Light Sheet Microscopy for high-resolution imaging of living and cleared samples	10.1101/2023.05.31.543173	non-homogenous
Cardiac glycosides restore autophagy flux in an iPSC-derived neuronal model of WDR45 deficiency	10.1101/2023.09.13.556416	wrong cell type
Linear ubiquitination at damaged lysosomes induces local NF-kappaB activation and controls cell survival	10.1101/2023.10.06.560832	wrong cell type
Mapping the landscape of lineage-specific dynamic regulation of gene expression using single-cell transcriptomics and application to genetics of complex disease	10.1101/2023.10.24.23297476	wrong cell type
Nicotinamide Riboside Supplementation Ameliorates Mitochondrial Dysfunction and Neuronal Loss in POLG Mutant Midbrain Organoids	10.1101/2023.11.08.566203	wrong cell type
Capture of Human Neuromesodermal and Posterior Neural Tube Axial Stem Cells	10.1101/2024.03.26.586760	wrong cell type
A novel induced pluripotent stem cell model of schwann cell differentiation reveals NF2 -related gene regulatory networks of the extracellular matrix	10.1101/2024.05.02.591952	wrong cell type
The Role of Alpha-Synuclein in Synucleinopathy: Impact on Lipid Regulation at Mitochondria-ER Membranes	10.1101/2024.06.17.599406	wrong cell type
Posterior specification of multi-lineage axial assembloids from human pluripotent stem cells	10.1101/2024.08.29.610410	wrong cell type
Wnt Signaling in Vertebrate Axis Specification	10.1101/cshperspect.a007955	wrong publication type
Embryonic heart progenitors and cardiogenesis	10.1101/cshperspect.a013847	wrong publication type
Cardiopharyngeal Progenitor Specification: Multiple Roads to the Heart and Head Muscles	10.1101/cshperspect.a036731	wrong publication type
Human ES cell-derived neural rosettes reveal a functionally distinct early neural stem cell stage	10.1101/gad.1616208	wrong cell type
Notch promotes epithelial-mesenchymal transition during cardiac development and oncogenic transformation	10.1101/gad.276304	non-human
Genetics of Alcohol Use Disorder: A Role for Induced Pluripotent Stem Cells?	10.1111/acer.13811	wrong publication type
Functional effects of cannabinoids during dopaminergic specification of human neural precursors derived from induced pluripotent stem cells	10.1111/adb.12394	wrong cell type
Development of an evaluation method for addictive compounds based on electrical activity of human iPS cell-derived dopaminergic neurons using microelectrode array	10.1111/adb.13443	wrong cell type
Current status of treating neurodegenerative disease with induced pluripotent stem cells	10.1111/ane.12545	wrong publication type
Breakdown of blood-nerve barrier in immune-mediated neuropathy	10.1111/cen3.12200	wrong publication type
Human Induced Pluripotent Stem Cell Derived Sensory Neurons are Sensitive to the Neurotoxic Effects of Paclitaxel	10.1111/cts.12912	wrong cell type
Neural induction: Historical views and application to pluripotent stem cells	10.1111/dgd.12703	wrong publication type
M1 muscarinic acetylcholine receptor-mediated inhibition of GABA release from striatal medium spiny neurons onto cholinergic interneurons	10.1111/ejn.15074	non-human
The human-specific nicotinic receptor subunit CHRFAM7A reduces α7 receptor function in human induced pluripotent stem cells-derived and transgenic mouse neurons	10.1111/ejn.16474	wrong cell type
Neural stem cell transplantation in the enteric nervous system: roadmaps and roadblocks	10.1111/j.1365-2982.2008.01257.x	wrong publication type
The microenvironment in chronic pancreatitis and pancreatic cancer induces neuronal plasticity	10.1111/j.1365-2982.2009.01428.x	no pluripotent stem cells/immortalization
Characterization and in vitro differentiation potential of a new human embryonic stem cell line, ReliCellhES1	10.1111/j.1432-0436.2006.00051.x	wrong cell type
Peripheral sensory neurons differentiate from neural precursors derived from human embryonic stem cells	10.1111/j.1432-0436.2007.00196.x	wrong cell type
Ex vivo gene transfer of brain-derived neurotrophic factor to the intact rat forebrain: neurotrophic effects on cholinergic neurons	10.1111/j.1460-9568.1996.tb01258.x	non-human
Glutamatergic modulation of synaptic plasticity at a PNS vertebrate cholinergic synapse	10.1111/j.1460-9568.2003.03028.x	non-human
Retinoic acid synthesis by a population of NG2-positive cells in the injured spinal cord	10.1111/j.1460-9568.2005.03928.x	non-human
Neurotrophins modulate neuron-glia interactions at a vertebrate synapse	10.1111/j.1460-9568.2007.05385.x	wrong cell type
BMP4 induction of sensory neurons from human embryonic stem cells and reinnervation of sensory epithelium	10.1111/j.1460-9568.2007.05909.x	wrong cell type
Meningeal cells induce dopaminergic neurons from embryonic stem cells	10.1111/j.1460-9568.2008.06027.x	wrong cell type
Neural precursors derived from human embryonic stem cells maintain long-term proliferation without losing the potential to differentiate into all three neural lineages, including dopaminergic neurons	10.1111/j.1471-4159.2007.04952.x	wrong cell type
The Na<sup>+</sup>-dependent L-ascorbic acid transporter SVCT2 expressed in brainstem cells, neurons, and neuroblastoma cells is inhibited by flavonoids	10.1111/j.1471-4159.2008.05788.x	wrong cell type
Investigating the utility of human embryonic stem cell-derived neurons to model ageing and neurodegenerative disease using whole-genome gene expression and splicing analysis	10.1111/j.1471-4159.2012.07825.x	wrong cell type
Functional properties of the uptake of amines in immortalised peptidergic neurones (transport-P)	10.1111/j.1476-5381.1996.tb15162.x	wrong cell type
Monoclonal antibody B2, a marker of neuroendocrine sympathoadrenal precursors, recognizes the Luke (LKE) antigen	10.1111/j.1537-2995.2005.04338.x	no pluripotent stem cells/immortalization
Neurotrophic factors promote cholinergic differentiation in human embryonic stem cell-derived neurons	10.1111/j.1582-4934.2009.00916.x	wrong cell type
Ednrb2 orients cell migration towards the dorsolateral neural crest pathway and promotes melanocyte differentiation	10.1111/j.1600-0749.2005.00230.x	non-human
Functional abnormalities in iPSC-derived cardiomyocytes generated from CPVT1 and CPVT2 patients carrying ryanodine or calsequestrin mutations	10.1111/jcmm.12581	wrong cell type
17beta-Oestradiol promotes differentiation of human embryonic stem cells into dopamine neurons via cross-talk between insulin-like growth factors-1 and oestrogen receptor beta	10.1111/jcmm.13090	wrong cell type
Distinct intrinsic and synaptic properties of pre-sympathetic and pre-parasympathetic output neurons in Barrington's nucleus	10.1111/jnc.12290	no pluripotent stem cells/immortalization
Modeling human neurological disorders with induced pluripotent stem cells	10.1111/jnc.12625	wrong publication type
Non-neuronal acetylcholine involved in reproduction in mammals and honeybees	10.1111/jnc.13953	wrong publication type
Cellular models of alpha-synuclein toxicity and aggregation	10.1111/jnc.14806	wrong publication type
Models and methods to study Schwann cells	10.1111/joa.13606	wrong publication type
In vivo transplantation of fetal human gut-derived enteric neural crest cells	10.1111/nmo.12900	no pluripotent stem cells/immortalization
Heterologous expression of the human wild-type and variant Na<sub>V</sub>1.8 (A1073V) in rat sensory neurons	10.1111/nmo.14748	non-human
Current understanding of bipolar disorder: Toward integration of biological basis and treatment strategies	10.1111/pcn.12852	wrong publication type
Shedding light on latent pathogenesis and pathophysiology of mental disorders: The potential of iPS cell technology	10.1111/pcn.13545	wrong publication type
Molecular and cellular neurocardiology in heart disease	10.1113/JP284739	wrong publication type
Contribution of pacemaker channels to autonomous electrical activity of differentiated embryonic stem cells	10.1113/jphysiol.2008.153338	wrong publication type
Sodium channel gene family: epilepsy mutations, gene interactions and modifier effects	10.1113/jphysiol.2010.188482	wrong publication type
Modulation of synaptic transmission to second-order peripheral chemoreceptor neurons in caudal nucleus tractus solitarius by α<sub>1</sub>-adrenoreceptors	10.1124/jpet.106.114033	no pluripotent stem cells/immortalization
Stem cell-derived nodal-like cardiomyocytes as a novel pharmacologic tool: insights from sinoatrial node development and function	10.1124/pr.114.009597	wrong publication type
High-throughput 3D screening for differentiation of hPSC-derived cell therapy candidates	10.1126/sciadv.aaz1457	wrong cell type
The cholinergic neuronal differentiation factor from heart cells is identical to leukemia inhibitory factor	10.1126/science.2512641	non-human
Disease modeling with patient-specific iPS cells	10.1126/science.347.6227.1271	wrong publication type
A new recipe for serotonergic neurons	10.1126/scitranslmed.aad5908	wrong cell type
Akt, a target of phosphatidylinositol 3-kinase, inhibits apoptosis in a differentiating neuronal cell line	10.1128/mcb.18.4.2143	non-human
The Use of Human Induced Pluripotent Stem Cells for Testing Neuroprotective Activity of Pharmacological Compounds	10.1134/S0006297919110075	wrong cell type
Investigation of the effects of GABA receptor agonists in the differentiation of human induced pluripotent stem cells into dopaminergic neurons	10.1134/s0012496616050045	wrong cell type
Human enteric nervous system progenitor transplantation improves functional responses in Hirschsprung disease patient-derived tissue	10.1136/gutjnl-2023-331532	wrong cell type
Large-scale sources of neural stem cells	10.1146/annurev.neuro.25.112701.142904	wrong publication type
Gene and Induced Pluripotent Stem Cell Therapy for Retinal Diseases	10.1146/annurev-genom-083118-015043	wrong publication type
Generating human neurons in vitro and using them to understand neuropsychiatric disease	10.1146/annurev-neuro-062012-170328	wrong publication type
Molecular mechanisms of fragile X syndrome: A twenty-year perspective	10.1146/annurev-pathol-011811-132457	wrong publication type
Organoids for drug discovery and personalized medicine	10.1146/annurev-pharmtox-010818-021108	wrong publication type
Developmental Mechanisms of Aortic Valve Malformation and Disease	10.1146/annurev-physiol-022516-034001	wrong publication type
Cardiomyocyte functional screening: Interrogating comparative electrophysiology of high-throughput model cell systems	10.1152/ajpcell.00306.2019	wrong cell type
Cell therapy for GI motility disorders: comparison of cell sources and proposed steps for treating Hirschsprung disease	10.1152/ajpgi.00018.2017	wrong publication type
NH(2)-terminal deletion of specific phosphorylation sites on PHOX2B disrupts the formation of enteric neurons in vivo	10.1152/ajpgi.00073.2021	wrong cell type
Heart failure in single right ventricle congenital heart disease: Physiological and molecular considerations	10.1152/ajpheart.00518.2019	wrong publication type
Exosomes from pediatric dilated cardiomyopathy patients modulate a pathological response in cardiomyocytes	10.1152/ajpheart.00673.2016	wrong cell type
Exercise training normalizes elevated firing rate of hypothalamic presympathetic neurons in heart failure rats	10.1152/ajpregu.00225.2018	no pluripotent stem cells/immortalization
Bionic epidural stimulation restores arterial pressure regulation during orthostasis	10.1152/japplphysiol.00162.2004	wrong publication type
Cardiovascular deconditioning increases GABA signaling in the nucleus tractus solitarii	10.1152/jn.00102.2022	no pluripotent stem cells/immortalization
Serotonergic control of GAB Aergic inhibition in the lateral amygdala	10.1152/jn.00500.2019	wrong cell type
Involvement of histaminergic inputs in the jaw-closing reflex arc	10.1152/jn.00515.2014	no pluripotent stem cells/immortalization
Glycinergic inputs to cardiac vagal neurons in the nucleus ambiguus are inhibited by nociceptin and mu-selective opioids	10.1152/jn.01117.2002	non-human
Advanced Modeling of Peripheral Neuro-Effector Communication and -Plasticity	10.1152/physiol.00010.2020	wrong publication type
Human iPSC derived cardiac myocytes and sympathetic neurons in disease modelling	10.1152/physiol.2023.38.S1.5727026	wrong publication type
Potential for Cell-Transplant Therapy with Human Neuronal Precursors to Treat Neuropathic Pain in Models of PNS and CNS Injury: Comparison of hNT2.17 and hNT2.19 Cell Lines	10.1155/2012/356412	wrong cell type
Applications of Induced Pluripotent Stem Cells in Studying the Neurodegenerative Diseases	10.1155/2015/382530	wrong publication type
Prospect of Human Pluripotent Stem Cell-Derived Neural Crest Stem Cells in Clinical Application	10.1155/2016/7695836	wrong publication type
A dishful of a troubled mind: Induced pluripotent stem cells in psychiatric research	10.1155/2016/7909176	wrong publication type
Nrf2/ARE Pathway Involved in Oxidative Stress Induced by Paraquat in Human Neural Progenitor Cells	10.1155/2016/8923860	wrong cell type
Ropinirole and Pramipexole Promote Structural Plasticity in Human iPSC-Derived Dopaminergic Neurons via BDNF and mTOR Signaling	10.1155/2018/4196961	wrong cell type
Biomaterial engineering for controlling pluripotent stem cell fate	10.1155/2018/9068203	wrong publication type
Development and Application of 3D Bioprinted Scaffolds Supporting Induced Pluripotent Stem Cells	10.1155/2021/4910816	wrong publication type
Production of Highly Uniform Midbrain Organoids from Human Pluripotent Stem Cells	10.1155/2023/3320211	wrong cell type
Cytotoxic effects of the main active components from three Chinese herbal medicines on N-methyl-N'-nitro-N-nitrosoguanidine transformed GES-1 cells. [Chinese]	10.11569/wcjd.v13.i4.477	wrong cell type
Signals involved in neural differentiation of human embryonic stem cells	10.1159/000231890	wrong publication type
Combined Growth Factor and Gene Therapy: An Approach for Hair Cell Regeneration and Hearing Recovery	10.1159/000493011	wrong publication type
The Dopamine Hypothesis of Autism Spectrum Disorder Revisited: Current Status and Future Prospects	10.1159/000515751	wrong publication type
Myocardin-related transcription factors - Critical coactivators regulating cardiovascular development and adaptation	10.1161/01.RES.0000259563.61091.e8	wrong publication type
Signaling pathways controlling second heart field development	10.1161/circresaha.109.194464	wrong publication type
The multiple phases and faces of wnt signaling during cardiac differentiation and development	10.1161/circresaha.110.221531	wrong publication type
Molecular and Cellular Mechanisms of Cardiovascular Disorders in Diabetes	10.1161/circresaha.116.306923	wrong publication type
Genome-Wide Analysis Identifies an Essential Human TBX3 Pacemaker Enhancer	10.1161/CIRCRESAHA.120.317054	wrong cell type
Rewiring of 3D Chromatin Topology Orchestrates Transcriptional Reprogramming and the Development of Human Dilated Cardiomyopathy	10.1161/circulationaha.121.055781	no pluripotent stem cells/immortalization
Mutant Phosphodiesterase 3A Protects From Hypertension-Induced Cardiac Damage	10.1161/CIRCULATIONAHA.122.060210	wrong cell type
Extracellular Matrix Disorganization Caused by ADAMTS16 Deficiency Leads to Bicuspid Aortic Valve With Raphe Formation	10.1161/circulationaha.123.065458	wrong cell type
An Anterior Second Heart Field Enhancer Regulates the Gene Regulatory Network of the Cardiac Outflow Tract	10.1161/circulationaha.123.065700	wrong cell type
Transient Bone Morphogenic Protein Antagonism Directs Differentiation of iPSCs into the Cardiac Neural Crest and cKit plus Myocardial Progenitor Lineages	10.1161/res.117.suppl_1.394	wrong publication type
Transcriptomic Changes During Induced Pluripotent Stem Cell-derived Neural Crest Cell Differentiation Highlight Genes Involved in Endocardial Cushion and Cardiac Outflow Tract Development	10.1161/res.125.suppl_1.210	wrong publication type
Neurotransmitter influence on human meibomian gland epithelial cells	10.1167/iovs.11-8113	wrong cell type
A purified population of multipotent cardiovascular progenitors derived from primate pluripotent stem cells engrafts in postmyocardial infarcted nonhuman primates	10.1172/jci40120	wrong cell type
Letters to the Editor	10.1176/appi.ajp.2015.15121545	wrong publication type
Co-transplantation of autologous treg cells: A groundbreaking cell therapy for brain diseases	10.1177/0271678X241245633	wrong publication type
DRG-Derived Neural Progenitors Differentiate into Functional Enteric Neurons Following Transplantation in the Postnatal Colon	10.1177/0963689718811061	non-human
Differentiation of Human Pluripotent Stem Cells Into Specific Neural Lineages	10.1177/09636897211017829	wrong publication type
Bioengineered 3D Glial Cell Culture Systems and Applications for Neurodegeneration and Neuroinflammation	10.1177/2472555217691450	wrong publication type
Congenital insensitivity to pain with anhidrosis: a literature review and the advocacy for stem cell therapeutic interventions	10.1177/26330040241292378	wrong publication type
Stem cell derived basal forebrain cholinergic neurons from Alzheimer's disease patients are more susceptible to cell death	10.1186/1750-1326-9-3	wrong cell type
Identifying altered developmental pathways in human globoid cell leukodystrophy iPSCs-derived NSCs using transcriptome profiling	10.1186/s12864-023-09285-6	wrong cell type
3D brain Organoids derived from pluripotent stem cells: Promising experimental models for brain development and neurodegenerative disorders Julie Y.H. Chan	10.1186/s12929-017-0362-8	wrong publication type
Important advances in Alzheimer's disease from the use of induced pluripotent stem cells	10.1186/s12929-019-0501-5	wrong publication type
Muscovy duck reovirus sigma NS protein triggers autophagy enhancing virus replication	10.1186/s12985-017-0722-8	non-human
Suitability of 3D human brain spheroid models to distinguish toxic effects of gold and poly-lactic acid nanoparticles to assess biocompatibility for brain drug delivery	10.1186/s12989-019-0307-3	wrong cell type
Prader-Willi syndrome mental health research strategy workshop proceedings: the state of the science and future directions	10.1186/s13023-016-0504-1	wrong publication type
Generation of human iPSC-derived neurofibromaspheres for in vitro and in vivo uses	10.1186/s13023-023-02666-w	wrong cell type
Induced pluripotent stem cells in Alzheimer's disease: Applications for disease modeling and cell-replacement therapy	10.1186/s13024-016-0106-3	wrong publication type
IPSC-derived familial Alzheimer's PSEN2 <sup>N141I</sup> cholinergic neurons exhibit mutation-dependent molecular pathology corrected by insulin signaling	10.1186/s13024-018-0265-5	wrong cell type
Stem cell models of Alzheimer's disease: Progress and challenges	10.1186/s13195-017-0268-4	wrong publication type
Bone marrow-derived neural crest precursors improve nerve defect repair partially through secreted trophic factors	10.1186/s13287-019-1517-1	non-human
HAND factors regulate cardiac lineage commitment and differentiation from human pluripotent stem cells	10.1186/s13287-024-03649-9	wrong cell type
Transcriptomic profiling across human serotonin neuron differentiation via the FEV reporter system	10.1186/s13287-024-03728-x	wrong cell type
PGCLCs of human 45,XO reveal pathogenetic pathways of neurocognitive and psychosocial disorders	10.1186/s13578-022-00925-0	no pluripotent stem cells/immortalization
Subtype-specific neurons from patient iPSCs display distinct neuropathological features of Alzheimer's disease	10.1186/s13619-024-00204-y	wrong cell type
The promise of stem cells in the therapy of Alzheimer's disease	10.1186/s40035-015-0029-x	wrong publication type
CRISPR/Cas9-Correctable mutation-related molecular and physiological phenotypes in iPSC-derived Alzheimer's PSEN2 N141I neurons	10.1186/s40478-017-0475-z	wrong cell type
Impaired lipid metabolism in astrocytes underlies degeneration of cortical projection neurons in hereditary spastic paraplegia	10.1186/s40478-020-01088-0	wrong cell type
Developmental cues for the maturation of metabolic, electrophysiological and calcium handling properties of human pluripotent stem cell-derived cardiomyocytes	10.1186/scrt406	wrong publication type
MicroRNA-363 negatively regulates the left ventricular determining transcription factor <i>HAND1</i> in human embryonic stem cell-derived cardiomyocytes	10.1186/scrt464	wrong cell type
Leukemia inhibitory factor and ciliary neurotropic factor promote the survival of sertoli cells and gonocytes in a coculture system	10.1210/en.137.5.1885	non-human
Functional Lactotrophs in Induced Adenohypophysis Differentiated from Human iPS Cells	10.1210/endocr/bqac004	wrong cell type
The production and directed differentiation of human embryonic stem cells	10.1210/er.2005-0016	wrong publication type
Islet1 cardiovascular progenitors: A single source for heart lineages?	10.1242/dev.001883	wrong publication type
Cell autonomous requirement for PDGFRα in populations of cranial and cardiac neural crest cells	10.1242/dev.00241	no pluripotent stem cells/immortalization
Somite-derived cells replace ventral aortic hemangioblasts and provide aortic smooth muscle cells of the trunk	10.1242/dev.02269	non-human
Vitamin A facilitates enteric nervous system precursor migration by reducing Pten accumulation	10.1242/dev.040550	wrong publication type
Mechanisms of thymus organogenesis and morphogenesis	10.1242/dev.059998	wrong publication type
Adult neurogenesis: Taking stock in Stockholm	10.1242/dev.109520	wrong publication type
MK - A PLURIPOTENTIAL EMBRYONIC STEM-CELL-DERIVED NEUROREGULATORY FACTOR	10.1242/dev.116.4.1175	no pluripotent stem cells/immortalization
Activin a directs striatal projection neuron differentiation of human pluripotent stem cells	10.1242/dev.117093	wrong cell type
CILIARY NEUROTROPHIC FACTOR MAINTAINS THE PLURIPOTENTIALITY OF EMBRYONIC STEM-CELLS	10.1242/dev.119.3.559	wrong cell type
Is this a brain which i see before me? Modeling human neural development with pluripotent stem cells	10.1242/dev.120568	wrong publication type
Sox2 is required for olfactory pit formation and olfactory neurogenesis through BMP restriction and <i>Hes5</i> upregulation	10.1242/dev.153791	wrong publication type
Divergent early mesoderm specification underlies distinct head and trunk muscle programmes in vertebrates	10.1242/dev.160945	wrong cell type
The development and stem cells of the esophagus	10.1242/dev.193839	wrong publication type
From head to tail: regionalization of the neural crest	10.1242/dev.193888	wrong publication type
SIX1+PAX3+ identify a progenitor for myogenic lineage commitment from hPSCs	10.1242/dev.201509	wrong cell type
Exploiting spatiotemporal regulation of FZD5 during neural patterning for efficient ventral midbrain specification	10.1242/dev.202545	wrong cell type
Cardiac repair and regeneration: the Rubik's cube of cell therapy for heart disease	10.1242/dmm.000240	wrong publication type
Transmembrane potential of GlyCl-expressing instructor cells induces a neoplastic-like conversion of melanocytes via a serotonergic pathway	10.1242/dmm.005561	wrong cell type
Plantainoside B in Bacopa monniera Binds to Abeta Aggregates Attenuating Neuronal Damage and Memory Deficits Induced by Abeta	10.1248/bpb.b22-00797	wrong cell type
Basic and clinical aspects of non-neuronal acetylcholine: Biological and clinical significance of non-canonical ligands of epithelial nicotinic acetylcholine receptors	10.1254/jphs.FM0070087	wrong publication type
Producing striatal phenotypes for transplantation in Huntington's disease	10.1258/ebm.2011.011359	wrong publication type
Gene-environment interactions in developmental neurotoxicity: A case study of synergy between chlorpyrifos and chd8 knockout in human brainspheres	10.1289/EHP8580	non-homogenous
The secreted metalloprotease ADAMTS20 is required for melanoblast survival	10.1371/journal.pgen.1000003	non-human
Dynamic and Differential Regulation of Stem Cell Factor FoxD3 in the Neural Crest Is Encrypted in the Genome	10.1371/journal.pgen.1003142	wrong cell type
Gene expression profile of neuronal progenitor cells derived from hESCs: Activation of chromosome 11p15.5 and comparison to human dopaminergic neurons	10.1371/journal.pone.0001422	wrong cell type
Xeno-free defined conditions for culture of human embryonic stem cells, neural stem cells and dopaminergic neurons derived from them	10.1371/journal.pone.0006233	wrong cell type
A novel combination of factors, termed SPIE, which promotes dopaminergic neuron differentiation from human embryonic stem cells	10.1371/journal.pone.0006606	wrong cell type
Identification by automated screening of a small molecule that selectively eliminates neural stem cells derived from hESCs but not dopamine neurons	10.1371/journal.pone.0007155	wrong cell type
Roles of ES Cell-Derived Gliogenic Neural Stem/Progenitor Cells in Functional Recovery after Spinal Cord Injury	10.1371/journal.pone.0007706	non-human
Specification of region-specific neurons including forebrain glutamatergic neurons from human induced pluripotent stem cells	10.1371/journal.pone.0011853	wrong cell type
beta-Amyloid 1-42 oligomers impair function of human embryonic stem cell-derived forebrain cholinergic neurons	10.1371/journal.pone.0015600	wrong cell type
Pax3 Stimulates p53 Ubiquitination and Degradation Independent of Transcription	10.1371/journal.pone.0029379	non-human
Characterization and Therapeutic Potential of Induced Pluripotent Stem Cell-Derived Cardiovascular Progenitor Cells	10.1371/journal.pone.0045603	wrong cell type
MicroRNA-Based Promotion of Human Neuronal Differentiation and Subtype Specification	10.1371/journal.pone.0059011	wrong cell type
p53 Gene Targeting by Homologous Recombination in Fish ES Cells	10.1371/journal.pone.0059400	non-human
PCTAIRE1-knockdown sensitizes cancer cells to TNF family cytokines	10.1371/journal.pone.0119404	wrong cell type
Ketamine causes mitochondrial dysfunction in human induced pluripotent stem cell: Derived neurons	10.1371/journal.pone.0128445	wrong cell type
Noggin over-expressing mouse embryonic fibroblasts and ms5 Stromal cells enhance directed differentiation of Dopaminergic neurons from human embryonic stem cells	10.1371/journal.pone.0138460	wrong cell type
In depth characterization of midbrain organoids derived from wild type iPSC lines	10.1371/journal.pone.0292926	non-homogenous
An in vitro model of latency and reactivation of varicella zoster virus in human stem cell-derived neurons	10.1371/journal.ppat.1004885	wrong cell type
Oximeter-based autonomic state indicator algorithm for cardiovascular risk assessment	10.1378/chest.09-3029	wrong publication type
An immortalized, type-1 astrocyte of mesencephalic origin source of a dopaminergic neurotrophic factor	10.1385/jmn:11:3:209	wrong cell type
Bone morphogenetic protein 4 promotes craniofacial neural crest induction from human pluripotent stem cells	10.1387/ijdb.160040mk	wrong cell type
Developmental and regenerative biology of cardiomyocytes	10.1387/ijdb.210159kh	wrong publication type
Autonomic control over myocardial function in vitro: Evaluation of current and future clinical therapies in a nonclinical setting	10.14814/phy2.15511	wrong publication type
Human pluripotent stem cells as tools for neurodegenerative and neurodevelopmental disease modeling and drug discovery	10.1517/17460441.2015.1037737	wrong publication type
The use of human neurons for novel drug discovery in dementia research	10.1517/17460441.2016.1154528	wrong publication type
Neuronal dysfunction in iPSC-derived medium spiny neurons from chorea-acanthocytosis patients is reversed by Src kinase inhibition and F-actin stabilization	10.1523/JNEUROSCI.0456-16.2016	wrong cell type
Integrating CRISPR engineering and hiPSC-derived 2D disease modeling systems	10.1523/JNEUROSCI.0518-19.2019	wrong publication type
Long-term Potentiation of Inhibitory Synaptic Transmission onto Cerebellar Purkinje Neurons Contributes to Adaptation of Vestibulo-Ocular Reflex	10.1523/jneurosci.0793-13.2013	non-human
DISTINCT REGULATORY PATHWAYS CONTROL NEUROFILAMENT EXPRESSION AND NEUROTRANSMITTER SYNTHESIS IN IMMORTALIZED SEROTONERGIC NEURONS	10.1523/JNEUROSCI.14-11-06744.1994	non-human
In vivo imaging of CNS injury and disease	10.1523/JNEUROSCI.1826-17.2017	wrong publication type
Glutamate Spillover Dynamically Strengthens Gabaergic Synaptic Inhibition of the Hypothalamic Paraventricular Nucleus	10.1523/jneurosci.1851-22.2023	non-human
Immortalized human dorsal root ganglion cells differentiate into neurons with nociceptive properties	10.1523/JNEUROSCI.19-13-05420.1999	wrong cell type
Defective Schwann cell lipid metabolism alters plasma membrane dynamics in Charcot-Marie-Tooth disease 1A	10.1523/jneurosci.2076-22.2023	wrong cell type
Caspase-3-dependent proteolytic cleavage of protein kinase Cdelta is essential for oxidative stress-mediated dopaminergic cell death after exposure to methylcyclopentadienyl manganese tricarbonyl	10.1523/jneurosci.22-05-01738.2002	wrong cell type
Proliferation and cell cycle dynamics in the developing stellate ganglion	10.1523/jneurosci.4350-12.2013	non-human
Optogenetic Stimulation of Locus Ceruleus Neurons Augments Inhibitory Transmission to Parasympathetic Cardiac Vagal Neurons via Activation of Brainstem alpha 1 and beta 1 Receptors	10.1523/jneurosci.5093-13.2014	non-human
Mitogen- and stress-activated protein kinase 1 mediates cAMP response element-binding protein phosphorylation and activation by neurotrophins	10.1523/jneurosci.5227-03.2004	wrong cell type
Probing disorders of the nervous system using reprogramming approaches	10.15252/embj.201591267	wrong publication type
Disease-specific phenotypes in iPSC-derived neural stem cells with POLG mutations	10.15252/emmm.202012146	wrong cell type
RNA polymerase II primes Polycomb-repressed developmental genes throughout terminal neuronal differentiation	10.15252/msb.20177754	non-human
Molecular Characterization of Embryonic Stem Cell-Derived Cardiac Neural Crest-Like Cells Revealed a Spatiotemporal Expression of an Mlc-3 Isoform	10.15283/ijsc19069	non-human
Expression of Major Histocompatibility Complex during Neuronal Differentiation of Somatic Cell Nuclear Transfer-Human Embryonic Stem Cells	10.15283/IJSC23037	wrong cell type
Expression and functional studies of the GDNF family receptor alpha 3 in the pancreas	10.1530/jme-15-0213	no pluripotent stem cells/immortalization
High-efficiency piezo-phototronic solar cells by strain-induced polarization	10.1557/s43577-023-00623-3	wrong publication type
Study of Neuro2a Cells on the Biomaterials Poly L-lactic Acid and Poly Caprolactone	10.1590/0104-1428.1555	wrong cell type
Functional properties of human embryonic stem cell-derived cardiomyocytes	10.1615/CritRevEukarGeneExpr.v20.i1.40	wrong publication type
Directed differentiation of dopaminergic neuronal subtypes from human embryonic stem cells	10.1634/stemcells.2004-0365	wrong cell type
A focused microarray to assess dopaminergic and glial cell differentiation from fetal tissue or embryonic stem cells	10.1634/stemcells.2005-0392	wrong cell type
Assessment of stromal-derived inducing activity in the generation of dopaminergic neurons from human embryonic stem cells	10.1634/stemcells.2008-0039	wrong cell type
Human embryonic stem cell differentiation toward regional specific neural precursors	10.1634/stemcells.2008-0543	wrong publication type
Dopaminergic differentiation of human embryonic stem cells	10.1634/stemcells.22-6-925	wrong cell type
TBC1D8B Mutations Implicate RAB11-Dependent Vesicular Trafficking in the Pathogenesis of Nephrotic Syndrome	10.1681/asn.2019040414	wrong cell type
Rs2459976 in <i>ZW10</i> gene associated with congenital heart diseases in Chinese Han population	10.18632/oncotarget.23240	wrong publication type
Novel therapeutic approaches: Rett syndrome and human induced pluripotent stem cell technology	10.21037/sci.2017.02.11	wrong publication type
Transcription Factors in Brain Regeneration: A Potential Novel Therapeutic Target	10.2174/0113894501279977231210170231	wrong publication type
Promising therapies for alzheimer's disease	10.2174/1381612822666160215154218	wrong publication type
Marrow stromal cells: Implications in health and disease in the nervous system	10.2174/156652405774641070	wrong publication type
The influence of thyroid hormone on ca<sup>2+</sup> signaling pathways during embryonal development	10.2174/1568026621666210603155653	wrong publication type
Induced pluripotent stem cells and their potential for basic and clinical sciences	10.2174/157340313805076278	wrong publication type
The Use of Stem Cells in Neural Regeneration: A Review of Current Opinion	10.2174/1574888x13666180720100738	wrong publication type
Uncovering the diversification of tissue engineering on the emergent areas of stem cells, nanotechnology and biomaterials	10.2174/1574888X15666200103124821	wrong publication type
Application of mesenchymal stem cells to age-related neuronal diseases	10.2174/1871522215666150910204710	wrong publication type
Stem cells for the treatment of neurological disorders	10.2174/187152708783885183	wrong publication type
Human induced pluripotent stem cells and the modelling of alzheimer's disease: The human brain outside the dish	10.2174/1874205X01711010027	wrong publication type
Protocol for 3D Bioprinting Mesenchymal Stem Cell-derived Neural Tissues Using a Fibrin-based Bioink	10.21769/bioprotoc.4663	wrong cell type
Stem cell transplantation for neurodegenerative disease: A distant dream?	10.2217/ahe.13.16	wrong publication type
Neural microphysiological systems for in vitro modeling of peripheral nervous system disorders	10.2217/bem-2019-0018	wrong publication type
Towards personalized cell-replacement therapies for brain repair	10.2217/pme.09.4	wrong publication type
Novel paths towards neural cellular products for neurological disorders	10.2217/rme.11.85	wrong publication type
Efficient Vascular and Neural Engraftment of Stem Cell-Derived Islets	10.2337/db23-0123	wrong cell type
Standards of induced pluripotent stem cells derived clinical-grade neural stem cells preparation and quality control (2021 China version)	10.26599/JNR.2021.9040005	wrong publication type
Differentiating human stem cells into neurons and glial cells for neural repair	10.2741/3916	wrong publication type
Genetically modified stem cells for the treatment of neurological diseases	10.2741/e449	wrong publication type
CULTURING OF ACOUSTIC NEUROMA - METHODOLOGICAL ASPECTS	10.3109/00016489509125180	no pluripotent stem cells/immortalization
Stem cells on the brain: Modeling neurodevelopmental and neurodegenerative diseases using human induced pluripotent stem cells	10.3109/01677063.2014.881358	wrong publication type
Important precautions when deriving patient-specific neural elements from pluripotent cells	10.3109/14653240903180092	wrong publication type
Metabolic Regulation of Cardiac Differentiation and Maturation in Pluripotent Stem Cells: A Lesson from Heart Development	10.31662/jmaj.2020-0036	wrong publication type
Progress in cerebral transplantation of expanded neuronal stem cells	10.3171/jns.2004.100.4.0659	wrong publication type
A tissue-engineered bioabsorbable nerve conduit created by three-dimensional culture of induced pluripotent stem cell-derived neurospheres	10.3233/bme-2012-0680	wrong cell type
Stem Cell-Derived Neurons as Cellular Models of Sporadic Alzheimer's Disease	10.3233/jad-180833	wrong cell type
Neural Stem Cells in the Treatment of Alzheimer's Disease: Current Status, Challenges, and Future Prospects	10.3233/JAD-220721	wrong publication type
Characteristics and Transcriptomic Analysis of Cholinergic Neurons Derived from Induced Pluripotent Stem Cells with APP Mutation in Alzheimer's Disease	10.3233/jad-240299	wrong cell type
A new technique for modeling neuronal connectivity using human pluripotent stem cells	10.3233/RNN-140488	wrong cell type
Human embryonic stem cells: Derivation, culture, and differentiation: A review	10.3233/RNN-2010-0543	wrong publication type
Reprogramming by Cytosolic Extract of Human Embryonic Stem Cells to Improve Dopaminergic Differentiation Potential of Human Adipose Tissue-derived Stem Cells	10.32598/bcn.12.6.2069.1	wrong cell type
Assessment of Ethanol-Induced Toxicity on iPSC-Derived Human Neurons Using a Novel High-Throughput Mitochondrial Neuronal Health (MNH) Assay	10.3389/fcell.2020.590540	wrong cell type
Cathepsin D Variants Associated With Neurodegenerative Diseases Show Dysregulated Functionality and Modified alpha-Synuclein Degradation Properties	10.3389/fcell.2021.581805	wrong publication type
Ventral Telencephalic Patterning Protocols for Induced Pluripotent Stem Cells	10.3389/fcell.2021.716249	wrong cell type
Brain organoids: Establishment and application	10.3389/fcell.2022.1029873	wrong cell type
Reduced LYNX1 expression in transcriptome of human iPSC-derived neural progenitors modeling fragile X syndrome	10.3389/fcell.2022.1034679	wrong cell type
Sympathetic Neurons Regulate Cardiomyocyte Maturation in Culture	10.3389/fcell.2022.850645	non-human
Sevoflurane promotes premature differentiation of dopaminergic neurons in hiPSC-derived midbrain organoids	10.3389/fcell.2022.941984	wrong cell type
Development of a functional human induced pluripotent stem cell-derived nociceptor MEA system as a pain model for analgesic drug testing	10.3389/fcell.2023.1011145	wrong cell type
Generation and characterization of NGLY1 patient-derived midbrain organoids	10.3389/fcell.2023.1039182	wrong cell type
Chenodeoxycholic acid rescues axonal degeneration in induced pluripotent stem cell-derived neurons from spastic paraplegia type 5 and cerebrotendinous xanthomatosis patients	10.3389/fcell.2023.1101423	wrong cell type
Differentiation of peripheral sensory neurons from iPSCs derived from stem cells from human exfoliated deciduous teeth (SHED)	10.3389/fcell.2023.1203503	wrong cell type
Genetic and Cellular Interaction During Cardiovascular Development Implicated in Congenital Heart Diseases	10.3389/fcvm.2021.653244	wrong publication type
Studying Brown Adipose Tissue in a Human in vitro Context	10.3389/fendo.2020.00629	wrong publication type
Loop Interrupted: Dysfunctional Chromatin Relations in Neurological Diseases	10.3389/fgene.2021.732033	wrong publication type
Human stem cell-derived neurons and astrocytes to detect novel auto-reactive IgG response in immune-mediated neurological diseases	10.3389/fimmu.2024.1419712	wrong cell type
Enrichment of novel CD3+F4/80+ cells in brown adipose tissue following adrenergic stimulation	10.3389/fimmu.2024.1455407	wrong cell type
In vivo Direct Conversion of Astrocytes to Neurons Maybe a Potential Alternative Strategy for Neurodegenerative Diseases	10.3389/fnagi.2021.689276	wrong publication type
Editorial: Advances in neural reprogramming, disease modeling and therapeutic insights	10.3389/fnagi.2023.1259765	wrong publication type
Optogenetics reveals a role for accumbal medium spiny neurons expressing dopamine D2 receptors in cocaine-induced behavioral sensitization	10.3389/fnbeh.2014.00336	wrong cell type
Striatal cholinergic interneurons in isolated generalized dystonia-rationale and perspectives for stem cell-derived cellular models	10.3389/fncel.2014.00205	wrong publication type
Characterization of induced pluripotent stem cell-derived human serotonergic neurons	10.3389/fncel.2017.00131	wrong cell type
Viral Infections Exacerbate FUS-ALS Phenotypes in iPSC-Derived Spinal Neurons in a Virus Species-Specific Manner	10.3389/fncel.2019.00480	wrong cell type
Transcription Factor-Based Fate Specification and Forward Programming for Neural Regeneration	10.3389/fncel.2020.00121	wrong publication type
Stem Cell Neurodevelopmental Solutions for Restorative Treatments of the Human Trunk and Spine	10.3389/fncel.2021.667590	wrong cell type
Culture Conditions for Human Induced Pluripotent Stem Cell-Derived Schwann Cells: A Two-Centre Study	10.3389/fncel.2023.1094070	wrong cell type
Editorial: Stem cell-derived retinal and brain organoid culture for disease modeling	10.3389/fncel.2024.1367482	wrong publication type
Exploring the prospects, advancements, and challenges of <i>in vitro</i> modeling of the heart-brain axis	10.3389/fncel.2024.1386355	wrong publication type
Which Method for Diagnosing Small Fiber Neuropathy?	10.3389/fneur.2020.00342	wrong publication type
Directed midbrain and spinal cord neurogenesis from pluripotent stem cells to model development and disease in a dish	10.3389/fnins.2014.00109	wrong publication type
Modeling physiological and pathological human neurogenesis in the dish	10.3389/fnins.2014.00183	wrong publication type
Non-engineered and engineered adult neurogenesis in mammalian brains	10.3389/fnins.2019.00131	wrong publication type
Impact of sleep-wake-associated neuromodulators and repetitive low-frequency stimulation on human iPSC-derived neurons	10.3389/fnins.2019.00554	wrong cell type
Brainstem Organoids From Human Pluripotent Stem Cells	10.3389/fnins.2020.00538	non-homogenous
Negative Symptoms of Schizophrenia and Dopaminergic Transmission: Translational Models and Perspectives Opened by iPSC Techniques	10.3389/fnins.2020.00632	wrong publication type
Prospects of Directly Reprogrammed Adult Human Neurons for Neurodegenerative Disease Modeling and Drug Discovery: iN vs. iPSCs Models	10.3389/fnins.2020.546484	wrong publication type
Research Advances on Therapeutic Approaches to Congenital Central Hypoventilation Syndrome (CCHS)	10.3389/fnins.2020.615666	wrong publication type
The Age of Brain Organoids: Tailoring Cell Identity and Functionality for Normal Brain Development and Disease Modeling	10.3389/fnins.2021.674563	wrong publication type
Peripheral nervous system: A promising source of neuronal progenitors for central nervous system repair	10.3389/fnins.2022.970350	wrong publication type
Human Pluripotent Stem Cell-Derived Neural Crest Cells for Tissue Regeneration and Disease Modeling	10.3389/fnmol.2019.00039	wrong publication type
Serotonergic Psychedelics in Neural Plasticity	10.3389/fnmol.2021.748359	wrong publication type
Alphalpha6-containing nicotinic acetylcholine receptors mediate nicotine-induced structural plasticity in mouse and human iPSC-derived dopaminergic neurons	10.3389/fphar.2018.00572	wrong cell type
Synergic action of L-acetylcarnitine and L-methylfolate in Mouse Models of Stress-Related Disorders and Human iPSC-Derived Dopaminergic Neurons	10.3389/fphar.2022.913210	wrong cell type
Identification of signaling pathways modifying human dopaminergic neuron development using a pluripotent stem cell-based high-throughput screening automated system: purinergic pathways as a proof-of-principle	10.3389/fphar.2023.1152180	wrong cell type
Mechanotransduction and Adrenergic Stimulation in Arrhythmogenic Cardiomyopathy: An Overview of in vitro and in vivo Models	10.3389/fphys.2020.568535	wrong publication type
From Brain Organoids to Networking Assembloids: Implications for Neuroendocrinology and Stress Medicine	10.3389/fphys.2021.621970	wrong publication type
Advances in the knowledge and therapeutics of schizophrenia, major depression disorder, and bipolar disorder from human brain organoid research	10.3389/fpsyt.2023.1178494	wrong publication type
How inflammation pathways contribute to cell death in neuro-muscular disorders	10.3390/biom11081109	wrong publication type
3d bioprinting mesenchymal stem cell-derived neural tissues using a fibrin-based bioink	10.3390/biom11081250	wrong cell type
Message in a Scaffold: Natural Biomaterials for Three-Dimensional (3D) Bioprinting of Human Brain Organoids	10.3390/biom13010025	wrong cell type
Timing and Graded BMP Signalling Determines Fate of Neural Crest and Ectodermal Placode Derivatives from Pluripotent Stem Cells	10.3390/biomedicines12102262	wrong publication type
Real-time monitoring of levetiracetam effect on the electrophysiology of an heterogenous human iPSC-derived neuronal cell culture using microelectrode array technology	10.3390/bios11110450	wrong cell type
Ouabain-induced gene expression changes in human ipsc-derived neuron culture expressing dopamine and camp-regulated phosphoprotein 32 and gaba receptors	10.3390/brainsci11020203	wrong cell type
A Fibroblast-Derived Secretome Stimulates the Growth and Invasiveness of 3D Plexiform Neurofibroma Spheroids	10.3390/cancers16142498	wrong cell type
Neuron-glia interaction in the developing and adult enteric nervous system	10.3390/cells10010047	wrong publication type
Role of shh in patterning human pluripotent cells towards ventral forebrain fates	10.3390/cells10040914	wrong publication type
Generation, Characterization, and Application of Inducible Proliferative Adult Human Epicardium-Derived Cells	10.3390/cells10082064	wrong cell type
Autophagy in alpha-synucleinopathies-an overstrained system	10.3390/cells10113143	wrong publication type
Generation of a NES-mScarlet Red Fluorescent Reporter Human iPSC Line for Live Cell Imaging and Flow Cytometric Analysis and Sorting Using CRISPR-Cas9-Mediated Gene Editing	10.3390/cells11020268	wrong cell type
D-Cysteine Activates Chaperone-Mediated Autophagy in Cerebellar Purkinje Cells via the Generation of Hydrogen Sulfide and Nrf2 Activation	10.3390/cells11071230	wrong cell type
Enhancement of Neuroglial Extracellular Matrix Formation and Physiological Activity of Dopaminergic Neural Cocultures by Macromolecular Crowding	10.3390/cells11142131	wrong cell type
Vertebrate Cell Differentiation, Evolution, and Diseases: The Vertebrate-Specific Developmental Potential Guardians <i>VENTX</i>/<i>NANOG</i> and <i>POU5</i>/<i>OCT4</i> Enter the Stage	10.3390/cells11152299	wrong publication type
Synapsin III Regulates Dopaminergic Neuron Development in Vertebrates	10.3390/cells11233902	wrong cell type
Cardiac Neural Crest and Cardiac Regeneration	10.3390/cells12010111	wrong publication type
Molecular and functional characterization of different BrainSphere models for use in neurotoxicity testing on microelectrode arrays	10.3390/cells12091270	wrong cell type
The Imperative for Innovative Enteric Nervous System-Intestinal Organoid Co-Culture Models: Transforming GI Disease Modeling and Treatment	10.3390/cells13100820	wrong publication type
Tracing early neurodevelopment in schizophrenia with induced pluripotent stem cells	10.3390/cells7090140	wrong publication type
In Vitro Differentiation of Human Skin-Derived Cells into Functional Sensory Neurons-Like	10.3390/cells9041000	wrong cell type
Revisiting the regenerative therapeutic advances towards erectile dysfunction	10.3390/cells9051250	wrong publication type
A simple differentiation protocol for generation of induced pluripotent stem cell-derived basal forebrain-like cholinergic neurons for alzheimer's disease and frontotemporal dementia disease modeling	10.3390/cells9092018	wrong cell type
Development of Colonic Organoids Containing Enteric Nerves or Blood Vessels from Human Embryonic Stem Cells	10.3390/cells9102209	non-homogenous
Age-related epigenetic derangement upon reprogramming and differentiation of cells from the elderly	10.3390/genes9010039	wrong publication type
Many Cells Make Life Work-Multicellularity in Stem Cell-Based Cardiac Disease Modelling	10.3390/ijms19113361	wrong publication type
PPP2R5D-related intellectual disability and neurodevelopmental delay: A review of the current understanding of the genetics and biochemical basis of the disorder	10.3390/ijms21041286	wrong publication type
Combined dendritic and axonal deterioration are responsible for motoneuronopathy in patient-derived neuronal cell models of chorea-acanthocytosis	10.3390/ijms21051797	wrong cell type
Origin of the induced pluripotent stem cells affects their differentiation into dopaminergic neurons	10.3390/ijms21165705	wrong cell type
Human mesenchymal stromal cells unveil an unexpected differentiation potential toward the dopaminergic neuronal lineage	10.3390/ijms21186589	no pluripotent stem cells/immortalization
Multiple roles for cholinergic signaling from the perspective of stem cell function	10.3390/ijms22020666	wrong publication type
Cellular models in schizophrenia research	10.3390/ijms22168518	wrong publication type
A Novel In Vitro Assay Using Human iPSC-Derived Sensory Neurons to Evaluate the Effects of External Chemicals on Neuronal Morphology: Possible Implications in the Prediction of Abnormal Skin Sensation	10.3390/ijms221910525	wrong cell type
Highly effective protocol for differentiation of induced pluripotent stem cells (Ips) into melanin-producing cells	10.3390/ijms222312787	wrong cell type
Modeling and Targeting Neuroglial Interactions with Human Pluripotent Stem Cell Models	10.3390/ijms23031684	wrong publication type
In Vivo and In Vitro Cartilage Differentiation from Embryonic Epicardial Progenitor Cells	10.3390/ijms23073614	wrong cell type
Composite Coatings Based on Recombinant Spidroins and Peptides with Motifs of the Extracellular Matrix Proteins Enhance Neuronal Differentiation of Neural Precursor Cells Derived from Human Induced Pluripotent Stem Cells	10.3390/ijms24054871	wrong cell type
Integrin-Driven Axon Regeneration in the Spinal Cord Activates a Distinctive CNS Regeneration Program	10.3390/ijms24065366	wrong cell type
PSEN1 E280A Cholinergic-like Neurons and Cerebral Spheroids Derived from Mesenchymal Stromal Cells and from Induced Pluripotent Stem Cells Are Neuropathologically Equivalent	10.3390/ijms24108957	wrong cell type
Organ-Chips Enhance the Maturation of Human iPSC-Derived Dopamine Neurons	10.3390/ijms241814227	wrong cell type
Application Prospect of Induced Pluripotent Stem Cells in Organoids and Cell Therapy	10.3390/ijms25052680	wrong publication type
ETS1 and HLHS: Implications for the Role of the Endocardium	10.3390/jcdd9070219	non-human
Spinal Cord Stimulation Prevents Autonomic Dysreflexia in Individuals with Spinal Cord Injury: A Case Series	10.3390/jcm12082897	wrong publication type
Energy metabolism disturbances in cell models of PARK2 CNV carriers with ADHD	10.3390/jcm9124092	wrong cell type
Neuro-ophthalmological findings in Friedreich's Ataxia	10.3390/jpm11080708	wrong publication type
Human-Induced Pluripotent Stem Cell Technology: Toward the Future of Personalized Psychiatry	10.3390/jpm12081340	wrong publication type
A Novel 3D Helical Microelectrode Array for In Vitro Extracellular Action Potential Recording	10.3390/mi13101692	wrong cell type
PKCdelta alternatively spliced isoforms modulate cellular apoptosis in retinoic acid-induced differentiation of human NT2 cells and mouse embryonic stem cells	10.3727/000000006783991890	no pluripotent stem cells/immortalization
Direct reprogramming of adult somatic cells into other lineages: Past evidence and future perspectives	10.3727/096368912X657477	wrong publication type
Developing a CT scoring system to predict the metastasis of recurrent laryngeal nerve lymph nodes in esophageal squamous cell cancer. [Chinese]	10.3760/cma.j.cn112149-20200224-00242	wrong publication type
Intranuclear microinjection of DNA into dissociated adult mammalian neurons	10.3791/1614	no pluripotent stem cells/immortalization
Analysis of Trunk Neural Crest Cell Migration using a Modified Zigmond Chamber Assay	10.3791/3330	no pluripotent stem cells/immortalization
Alginate microcapsule as a 3D platform for propagation and differentiation of human embryonic stem cells (hESC) to different lineages	10.3791/3608	wrong cell type
Feeder-free Derivation of Neural Crest Progenitor Cells from Human Pluripotent Stem Cells	10.3791/51609	wrong cell type
Automated Production of Human Induced Pluripotent Stem Cell-Derived Cortical and Dopaminergic Neurons with Integrated Live-Cell Monitoring	10.3791/61525	wrong cell type
A Gut-on-a-Chip Model to Study the Gut Microbiome-Nervous System Axis	10.3791/64483	wrong cell type
A Review of CRISPR Cas9 for Alzheimer's Disease: Treatment Strategies and Could target APOE e4, APP, and PSEN-1 Gene using CRISPR cas9 Prevent the Patient fromAlzheimer's Disease?	10.3889/OAMJMS.2022.9053	wrong publication type
Galectin-1 and galectin-3 as key molecules for peripheral nerve degeneration and regeneration	10.3934/molsci.2016.3.325	wrong cell type
Tyrosine hydroxylase-positive cells and dopaminergic neuronal function in human embryonic stem cells: An electrophysiological validation	10.3969/j.issn.1673-5374.2010.03.004	wrong cell type
Regulation of neural stem cell fate by natural products	10.4062/biomolther.2018.184	wrong publication type
Shine bright: Considerations on the use of fluorescent substrates in living monoaminergic neurons in vitro	10.4103/1673-5374.165223	wrong publication type
Deriving striatal projection neurons from human pluripotent stem cells with activin a	10.4103/1673-5374.169621	wrong cell type
Exploring pre-degenerative alterations in humans using induced pluripotent stem cell-derived dopaminergic neurons	10.4103/1673-5374.211184	wrong cell type
Cell-based therapy in Alzheimer's disease: Can human fetal cholinergic neurons "untangle the skein"?	10.4103/1673-5374.241459	wrong publication type
Patterning inconsistencies restrict the true potential of dopaminergic neurons derived from human induced pluripotent stem cells	10.4103/1673-5374.295316	wrong publication type
Multiple factors to assist human-derived induced pluripotent stem cells to efficiently differentiate into midbrain dopaminergic neurons	10.4103/1673-5374.378203	wrong cell type
Insight into Neurodegenerative Disorder Using Melanocytes as a Model System	10.4103/aian.AIAN_466_19	wrong publication type
From "directed differentiation" to "neuronal induction": Modeling neuropsychiatric disease	10.4137/BMIMI.S20066	wrong publication type
Overexpression of HOX genes is prevalent in Ewing sarcoma and is associated with altered epigenetic regulation of developmental transcription programs	10.4161/15592294.2014.988048	wrong cell type
Tenascin-C: Form versus function	10.4161/19336918.2014.987587	wrong cell type
Lineage reprogramming: A shortcut to generating functional neurons from fibroblasts	10.4161/cc.10.20.17691	wrong publication type
Role of <i>Hox</i> genes in stem cell differentiation	10.4252/wjsc.v7.i3.583	wrong publication type
Is this the era of interstitial cells of cajal transplantation?	10.5056/jnm14064	wrong publication type
Safety and efficacy of His bundle pacing validated by extracardiac vagal nerve stimulation (HIS-STORY)	10.5603/CJ.a2022.0053	no pluripotent stem cells/immortalization
Tempering hope with realism: Induced pluripotent stem cells in regenerative medicine	10.5694/mja11.11039	wrong publication type
Rapid generation of functional dopaminergic neurons from human induced pluripotent stem cells through a single-step procedure using cell lineage transcription factors	10.5966/sctm.2012-0133	wrong cell type
Meeting report: Using stem cells for biological and therapeutics discovery in mental illness, April 2012	10.5966/sctm.2012-0149	wrong publication type
Efficient and rapid derivation of primitive neural stem cells and generation of brain subtype neurons from human pluripotent stem cells	10.5966/sctm.2013-0080	wrong cell type
Intrastriatal transplantation of adult human neural crest-derived stem cells improves functional outcome in parkinsonian rats	10.5966/sctm.2014-0078	no pluripotent stem cells/immortalization
Nanos3 Gene Targeting in Medaka ES Cells	10.7150/ijbs.6507	non-human
The S100A4 protein signals through the ErbB4 receptor to promote neuronal survival	10.7150/thno.22274	wrong cell type
Grafted human ESC-derived astroglia repair spinal cord injury via activation of host anti-inflammatory microglia in the lesion area	10.7150/THNO.70929	wrong cell type
<i>GATA6</i> mutations in hiPSCs inform mechanisms for maldevelopment of the heart, pancreas, and diaphragm	10.7554/eLife.53278	wrong cell type
The warburg effect and lactate signaling augment fgf-mapk to promote sensory-neural development in the otic vesicle	10.7554/eLife.56301	non-human
Combined lineage tracing and scRNA-seq reveals unexpected first heart field predominance of human iPSC differentiation	10.7554/eLife.80075	wrong cell type
SNORD90 induces glutamatergic signaling following treatment with monoaminergic antidepressants	10.7554/eLife.85316	non-human
BMP4: a Possible Key Factor in Differentiation of Auditory Neuron-Like Cells from Bone-Derived Mesenchymal Stromal Cells	10.7754/Clin.Lab.2015.150217	no pluripotent stem cells/immortalization
Inoperable Left Renal Vein Leiomyosarcoma Refractory to Chemotherapy Invades Inferior Vena Cava and Right Atrium: A Case Report	10.7759/cureus.13182	wrong publication type
Role of the enteric nervous system in the elongated sigmoid colon of patients with sigmoid volvulus	10.9738/intsurg-d-13-00198.1	wrong publication type
A robust method to derive functional neural crest cells from human pluripotent stem cells	n/a	wrong cell type
ACCELERATED DIRECTED DIFFERENTIATION OF HUMAN INDUCED PLURIPOTENT STEM CELL DERIVED SCHWANN CELL PRECURSORS FOR MODELING PERIPHERAL NEUROBIOLOGY	n/a	wrong publication type
Advances and controversies in the management of high-risk neuroblastoma. [Catalan]	n/a	wrong publication type
COMPARING THE PERIPHERAL NERVE REGENERATIVE POTENTIAL OF SCHWANN CELL PRECURSORS AND SCHWANN CELLS DIFFERENTIATED FROM HUMAN IPSCS	n/a	wrong publication type
Comparison of differentiation of induced pluripotent stem cells and bone-marrow mesenchymal stem cells to osteoblast: Osteogenesis versus pluripotency	n/a	wrong cell type
Dehydroepiandrosterone (DHEA) inhibits the growth of some non-tumorigenic and tumorigenic neural and non-neural cell lines	n/a	wrong cell type
Enhancing Our Understanding of Cell Types, Differentiation, and Disease Through Enhancers An Interview with Cesar Daniel Melendez-Ramirez, MS	n/a	wrong publication type
Human embryonic stem cells for neuronal repair	n/a	wrong publication type
Induced pluripotent stem cell-derived hepatocytes as an alternative to human adult hepatocytes	n/a	wrong publication type
Induced pluripotent stem cells in modeling and cell-based therapy of amyotrophic lateral sclerosis	n/a	wrong publication type
Multiple functions of the cholinesterase inhibiting polyalkylpyridinium salts extracted from the marine sponge, Haliclona sarai	n/a	wrong publication type
Neurotoxicity of paclitaxel and vincristine in iPSC-derived Schwann cell precursors and Schwann cells	n/a	wrong cell type
Prospects for embryonic stem cell treatment of digestive disease	n/a	wrong publication type
Small bowel nonendocrine neoplasms: Current concepts and novel perspectives	n/a	wrong publication type
Tailoring human embryonic stem cells for neurodegenerative disease therapy	n/a	wrong publication type
The interaction between serotonergic and cannabinoidergic modulations involved in the fear extinction. [Japanese]	n/a	wrong publication type
Toxicity effects of methamphetamine on embryonic stem cell-derived neuron	n/a	wrong cell type

## Sheet: Figure 7a+7b
Article first author and publication year	Doi	Figure or text of definition	Definition type	TH	DBH	PRPH	GATA3	ASCL1	PHOX2B	PHOX2A	NTRK1	ISL1	SCG10	VMAT1	CHRNA3/B4	TUBB3	NET1	KCNQ1	ACE2	SYN1	O-GlcNAc	HOXC9	SCN3A	ATOH1	UBA6	Arc	α2ADR	β2ADR	VMAT2	cFos	NPY	Norepinephrine	MAP2	HAND2
Huang et al. 2016	https://doi.org/10.1038/srep19727	Figure 4B	Immunofluorescence	Yes	Yes	No	No	No	No	No	No	No	No	No	No	No	No	No	No	No	No	No	No	No	No	No	No	No	No	No	No	No	No	No
Oh et al. 2016	https://doi.org/10.1016/j.stem.2016.05.002	Figure 3C	Quantification	Yes	Yes	Yes	Yes	No	No	No	No	No	No	No	No	No	No	No	No	No	No	No	No	No	No	No	No	No	No	No	No	No	No	No
Zeltner et al. 2016	https://doi.org/10.1038/nm.4220	Supplementary Figure 9B	Quantification	Yes	No	No	No	Yes	No	No	No	No	No	No	No	No	No	No	No	No	No	No	No	No	No	No	No	No	No	No	No	No	No	No
Zhang et al. 2016	https://doi.org/10.1371/journal.pone.0148062	Figure 4C	RT-qPCR	Yes	No	No	No	No	Yes	Yes	Yes	No	No	No	No	No	No	No	No	No	No	No	No	No	No	No	No	No	No	No	No	No	No	No
Carr-Wilkinson et al. 2018	https://doi.org/10.1155/2018/4391641	"On day 28 post p75 sorting, dual immunofluorescence identified sympathetic neurons by PRPH and TH copositivity cells in H9 cells (Figure 6(b-i)) in up to 20% cells. Noradrenergic sympathetic neurons identified by copositivity for both PHOX2B and DBH were present in 9.4% ± 5.5% H9 cells (Figure 6(b-ii))."	Quantification	Yes	Yes	Yes	No	No	Yes	No	No	No	No	No	No	No	No	No	No	No	No	No	No	No	No	No	No	No	No	No	No	No	No	No
Frith et al. 2018	https://doi.org/10.7554/eLife.35786	Figure 5C	Quantification	No	No	No	Yes	Yes	Yes	No	No	Yes	No	No	No	No	No	No	No	No	No	No	No	No	No	No	No	No	No	No	No	No	No	No
Kirino et al. 2018	https://doi.org/10.1038/s41598-018-31256-1	Figure 3G	Quantification	Yes	Yes	Yes	No	No	No	No	No	No	No	No	No	No	No	No	No	No	No	No	No	No	No	No	No	No	No	No	No	No	No	No
Frith et al. 2019	https://doi.org/10.1002/cpsc.81	Figure 4D	Immunofluorescence	Yes	No	No	Yes	Yes	No	No	No	Yes	No	No	No	No	No	No	No	No	No	No	No	No	No	No	No	No	No	No	No	No	No	No
Saito-Diaz et al. 2019	https://doi.org/10.1002/cpsc.78	No data provided	n/a	n/a	n/a	n/a	n/a	n/a	n/a	n/a	n/a	n/a	n/a	n/a	n/a	n/a	n/a	n/a	n/a	n/a	n/a	n/a	n/a	n/a	n/a	n/a	n/a	n/a	n/a	n/a	n/a	n/a	n/a	n/a
Hackland et al. 2019	https://doi.org/10.1016/j.stemcr.2019.04.015	Figure 2	Immunofluorescence	Yes	No	Yes	No	No	No	No	No	No	No	No	No	No	No	No	No	No	No	No	No	No	No	No	No	No	No	No	No	No	No	No
Gomez et al. 2019	https://doi.org/10.1242/dev.175604	"Interestingly, NC generated with high WNT are able to differentiate into peripheral neurons (99.74% peripherin+/nuclei), glia (93.74% S100B+/nuclei, 92.08% SOX10+/nuclei), melanoblasts (85.61% MITF+/nuclei, 83.52% SOX10+/nuclei) and sympathoadrenal derivatives (49.73% ASCL+/nuclei, 100% GATA3+/nuclei, 99.5% HOXC9+/nuclei), but failed to generate chondrocytes and adipocytes according to their sus…	Quantification	No	No	No	Yes	Yes	No	No	No	No	No	No	No	No	No	No	No	No	No	Yes	No	No	No	No	No	No	No	No	No	No	No	No
Takayama et al. 2020	https://doi.org/10.1038/s41598-020-66303-3	Figure 2C; Figure 2E; Figure 3D; Figure 4D	Immunofluorescence	Yes	Yes	Yes	No	No	No	No	No	No	No	No	No	No	No	No	No	No	No	No	No	No	No	No	No	No	No	No	No	No	No	No
Winbo et al. 2020	https://doi.org/10.1152/ajpheart.00546.2020	Figure 2K	Quantification	Yes	No	Yes	No	No	No	No	No	No	No	No	Yes	No	No	No	No	No	No	No	No	No	No	No	No	No	No	No	No	No	No	No
Wu & Zeltner 2020	https://doi.org/10.3791/60843	Figure 5A	Immunofluorescence	Yes	Yes	Yes	No	Yes	Yes	No	No	No	No	No	No	Yes	Yes	No	No	No	No	No	No	No	No	No	No	No	No	No	No	No	No	No
Winbo et al. 2021	https://doi.org/10.1152/ajpheart.01002.2020	Figure 2	Immunofluorescence	Yes	No	Yes	No	No	No	No	No	No	No	No	No	No	No	Yes	No	No	No	No	No	No	No	No	No	No	No	No	No	No	No	No
Bernardin et al. 2022	https://doi.org/10.3390/cells11233764	Figure 6	Immunofluorescence	Yes	No	No	No	No	No	No	No	No	No	No	No	Yes	No	No	No	No	No	No	No	No	No	No	No	No	No	No	No	No	No	No
Wu et al. 2022	https://doi.org/10.1007/s10286-021-00850-1	Figure 1D	Immunofluorescence	No	No	Yes	No	No	No	No	No	No	No	No	No	No	No	No	Yes	No	No	No	No	No	No	No	No	No	No	No	No	No	No	No
Wu et al. 2022	https://doi.org/10.1038/s41467-022-34811-7	Supplementary Figure 3A	Quantification	Yes	No	Yes	No	No	No	No	No	No	No	No	No	No	No	No	No	No	No	No	No	No	No	No	No	No	No	No	No	No	No	No
Li et al. 2023	https://doi.org/10.1098/rstb.2022.0173	Figure 1D	Quantification	Yes	No	No	No	No	No	No	No	No	No	No	No	No	No	No	No	No	No	No	No	No	No	No	No	No	No	No	No	No	No	No
Takayama et al. 2023	https://doi.org/10.3390/ijms24109053	Figure 1D	Immunofluorescence	No	Yes	Yes	No	No	No	No	No	No	No	No	No	No	No	No	No	Yes	No	No	No	No	No	No	No	No	No	No	No	No	No	No
Wu et al. 2023	https://doi.org/10.3389/fnins.2023.1137847	Figure 1J; Supplementary Figure 1	Immunofluorescence	Yes	No	Yes	No	No	No	No	No	No	No	No	No	No	No	No	No	No	Yes	No	No	No	No	No	No	No	No	No	No	No	No	No
van Haver et al. 2023	https://doi.org/10.1016/j.isci.2023.108096	Figure 1B	Immunofluorescence	Yes	No	No	No	No	No	No	No	No	No	No	No	No	No	No	No	No	No	No	No	No	No	No	No	No	No	No	No	No	No	No
Saleh et al. 2024	https://doi.org/10.1016/j.freeradbiomed.2024.01.016	Figure 1C	Immunofluorescence	Yes	No	Yes	No	No	No	No	No	No	No	No	No	Yes	No	No	No	No	No	No	Yes	No	No	No	No	No	No	No	No	No	No	No
Amer-Sarsour et al. 2024	https://doi.org/10.1038/s44318-023-00018-9	Figure 5A	Immunofluorescence	Yes	No	Yes	No	No	Yes	No	No	No	No	No	No	Yes	No	No	No	No	No	No	No	Yes	Yes	Yes	No	No	No	No	No	No	No	No
Saldana-Guerrero et al. 2024	https://doi.org/10.1038/s41467-024-47945-7	Figure 1A; Supplementary Figure 1	Immunofluorescence	No	No	Yes	No	Yes	Yes	No	No	No	No	No	No	No	No	No	No	No	No	No	No	No	No	No	No	No	No	No	No	No	No	No
Fan et al. 2024	https://doi.org/10.1007/s12031-024-02196-5	Figure 4C; Figure 4E	Quantification	Yes	Yes	Yes	No	No	No	No	No	No	No	No	No	Yes	No	No	No	No	No	No	No	No	No	No	No	No	No	No	No	No	No	No
Wu et al. 2024	https://doi.org/10.1016/j.xpro.2024.102970	Figure 2	Immunofluorescence	Yes	No	Yes	No	No	No	No	Yes	No	No	Yes	Yes	Yes	Yes	No	No	No	No	No	No	No	No	No	Yes	Yes	Yes	Yes	Yes	No	No	No
Fan et al. 2024	https://doi.org/10.1016/j.xcrm.2024.101559	Supplementary Figure 1A; Supplementary Figure 1B	Immunofluorescence	Yes	Yes	No	No	No	Yes	No	No	No	No	No	No	Yes	No	No	No	No	No	No	No	No	No	No	No	No	No	No	No	Yes	No	No
Akagi et al. 2024	https://doi.org/10.3390/molecules29133174	Supplementary Figure 2B	Immunofluorescence	No	No	Yes	No	No	No	No	No	No	No	No	No	No	No	No	No	No	No	No	No	No	No	No	No	No	No	No	No	No	Yes	No
Cheng et al. 2024	https://doi.org/10.1038/s41598-024-73947-y	Supplementary Figure 6	Quantification	No	Yes	No	No	No	Yes	No	No	No	No	No	No	No	No	No	No	No	No	No	No	No	No	No	No	No	No	No	No	No	No	Yes
	Figure 7a and 7b - Sympathetic neuron definitions per article
	Definitions of sympathetic neurons per article. n/a = not available. RT-qPCR = quantitative reverse transcriptase polymerase chain reaction.
	Only one of quantification, immunofluorescence or RT-qPCR data was collected per article. Quantification data was preferentially collected over immunofluorescence or RT-qPCR. Immunofluorescence data was collected preferentially over RT-qPCR.

## Sheet: Figure 7c
Article first author and publication year	Doi	Protocol first author and publication year	Number of days since the start of differentiation quantification was performed at	Percentage of cells expressing the sympathetic neuron marker	Standard error of the mean	Sample size	Sympathetic neuron marker
Oh et al. 2016	https://doi.org/10.1016/j.stem.2016.05.002	Oh et al. 2016	21	53	16.5	3	TH+
Zeltner et al. 2016	https://doi.org/10.1038/nm.4220	Zeltner et al. 2016	30	17	3.76	6	TH+
Frith et al. 2018	https://doi.org/10.7554/eLife.35786	Frith et al. 2018	18	42.3	n/a	1	GATA3+
Kirino et al. 2018	https://doi.org/10.1038/s41598-018-31256-1	Kirino et al. 2018	39	87	1.9	6	TH+
Carr-Wilkinson et al. 2018	https://doi.org/10.1155/2018/4391641	Carr-Wilkinson et al. 2018	36	20	NR	3	TH+PRPH+
Gomez et al. 2019	https://doi.org/10.1242/dev.175604	Gomez et al. 2019	9	100	NR	NR	GATA3+
Wu et al. 2022	https://doi.org/10.1038/s41467-022-34811-7	Wu & Zeltner 2020	30	73	2.1	11	TH+
Winbo et al. 2020	https://doi.org/10.1152/ajpheart.00546.2020	Winbo et al. 2020	54	86	5.7	11	TH+
Li et al. 2023	https://doi.org/10.1098/rstb.2022.0173	Winbo et al. 2020	50	84.3	n/a	1	TH+
Fan et al. 2024	https://doi.org/10.1007/s12031-024-02196-5	Fan et al. 2024	42	77.8	4	6	TH+
Cheng et al. 2024	https://doi.org/10.1038/s41598-024-73947-y	Huang et al. 2016	12	68	6.6	3	DBH+
Cheng et al. 2024	https://doi.org/10.1038/s41598-024-73947-y	Frith et al. 2018	12	95.2	2.9	3	DBH+
Cheng et al. 2024	https://doi.org/10.1038/s41598-024-73947-y	Kirino et al. 2018	12	96.3	2.6	3	DBH+
	Figure 7c - Sympathetic neuron efficiency quantifications
	Sympathetic neuron efficiency quantification per article. n/a = not available. NR = not reported. TH = tyrosine hydroxylase. GATA3 = GATA binding protein 3. PRPH = peripherin. DBH = dopamine beta-hydroxylase.
	Only one efficiency marker was collected per article. %TH+ was collected preferentially over the other markers. %TH%PRPH+ was collected preferentially over %GATA3+ and %DBH+.
